# Supplementary material for: Transcriptome-wide association study-derived genes as potential visceral adipose tissue-specific targets for type 2 diabetes
Source: Springer Nature journal article supplement (doi:10.1007/s00125-023-05978-5), 2023-08-04
Supplement: MOESM1 [file 125_2023_5978_MOESM1_ESM.pdf]

## 1    **ESM Methods**

### 2    **Study design**

3    The study flow chart is depicted in Fig. 1. First, we selected genetic variants as instrumental variables  
4    (IVs) ( $p < 5 \times 10^{-8}$ ) for VAT and retrieved the complete summary data from the GWASs for type 2 diabetes  
5    (one for discovery and the other for replication analysis) and glucose-related traits. Second, we performed  
6    univariable and bidirectional two-sample MR with seven MR methods, including inverse-variance  
7    weighted (IVW), weighted median, MR-Egger regression, MR-Pleiotropy Residual Sum and Outlier  
8    (MR-PRESSO), MR-Robust adjusted profile score (MR-RAPS), Causal Analysis Using Summary Effect  
9    Estimates (CAUSE), and Generalized Summary-data-based Mendelian Randomisation (GSMR). Third,  
10   we conducted a series of sensitivity analyses and multivariable MR adjusted for body mass index (BMI),  
11   waist circumference (WC), waist-hip ratio (WHR), and smoking status. Fourth, we did a TWAS to identify  
12   transcribed VAT-specific candidate genes for which expression is related to type 2 diabetes risk. Fifth,  
13   we identified specific cell types in VAT with specific expression of the candidate genes using DEPICT  
14   software and publicly available single-cell transcriptomic data. Finally, we conducted knockdown  
15   experiments in 3T3-L1 preadipocytes to validate the TWAS findings.

16

### 17   **Univariable and multivariable MR analyses**

#### 18   **Selection of exposures**

19   The UK Biobank enrolled more than 500,000 participants aged 40-69 years old from the United Kingdom  
20   between 2006 and 2010, and it contains the in-depth genetic and health information of these participants.  
21   This study aimed to identify phenotypic and health-related information by following up with participants  
22   over time. All participants gave written informed consent for data collection, analysis, and record linkage.

1 The summary data of predicted VAT mass in this study were based on a recent large-scale GWAS, which  
 2 was constructed of two subcohorts. One subcohort was called the VAT-training dataset. In this subcohort  
 3 the VAT was measured by dual energy X-ray absorptiometry (DXA, GE Healthcare Lunar iDXA scanner)  
 4 in 4198 individuals of white British ancestry and used to create prediction models. The other subcohort  
 5 was called the VAT-application dataset. This subcohort included 325,153 individuals, and the VAT was  
 6 calculated according to the prediction models [coefficient of determination = 0.76 (0.74 to 0.78)] [1].  
 7 GWAS summary data for the predicted VAT are available at  
 8 <https://www.ebi.ac.uk/gwas/downloads/summary-statistics> (Study Accession ID: GCST008744).  
 9 Similarly, we extracted four parameters of the GWAS summary data to serve as confounding factors to  
 10 be adjusted in multivariable MR analysis. BMI was obtained from a meta-analysis of GWASs including  
 11 681,275 participants [2]. WC and WHR were obtained from the Genetic Investigation of ANthropometric  
 12 Traits consortium (GIANT,  
 13 [https://portals.broadinstitute.org/collaboration/giant/index.php/GIANT\\_consortium\\_data\\_files](https://portals.broadinstitute.org/collaboration/giant/index.php/GIANT_consortium_data_files))  
 14 including 336,639 and 210,082 participants, respectively. The data for smoking status were obtained  
 15 from the UK Biobank including 462,434 participants (available data extracted from the MR-Base  
 16 database) [3].  
 17 Among the SNPs available in each GWAS summary dataset, we selected SNPs robustly associated with  
 18 exposures as IVs ( $p < 5 \times 10^{-8}$ , IV Assumption 1, ESM Fig. 1). To minimize the linkage disequilibrium  
 19 (LD) effects that lead to nonrandomized allele allocation, a relatively stringent condition (LD threshold  
 20 of  $r^2 < 0.001$  and distance located 10000 kb apart from each other) was set to ensure that the selected IVs  
 21 were conditionally independent of each other. The  $F$ -statistic represents the strength of the relationship  
 22 between the IVs and exposures. Generally, an  $F$ -statistic  $> 10$  provides evidence against the possibility

1 of bias produced by weak IVs [4].

2

### 3 **Selection of outcomes**

4 We collected the summary data of the discovery type 2 diabetes cohort obtained from the DIAbetes

5 Genetics Replication And Meta-analysis (DIAGRAM, <http://diagram-consortium.org/downloads.html>)

6 consortium (26,676 cases and 132,532 controls with a mean age of 57.4 years old) [5]. For the replication

7 analysis, we collected the summary data of another type 2 diabetes cohort from the 70KforT2D project

8 (70KforT2D, <https://t2d.hugeamp.org/>), including 12,931 cases and 57,196 controls [6]. In addition, we

9 also included glucose-related traits, such as glycated hemoglobin (HbA1c), fasting glucose (FG), 2h-

10 glucose (2hGlu), and fasting insulin (FI), into our MR analysis. These data were obtained from the Meta-

11 Analyses of Glucose and Insulin-related traits Consortium (MAGIC, <https://magicinvestigators.org/>),

12 which is a meta-analysis of 91 studies with 200,622 participants [7].

13 The participants had an identical genetic background (European ancestry), and to our knowledge, there

14 was no sample overlap between the exposure and outcome GWASs.

15

### 16 **Transcriptome-wide association analysis**

17 We used the recently released data of the Genotype-Tissue Expression (GTEx,

18 <https://gtexportal.org/home/>) project (V8), which includes RNA sequencing data and whole-genome

19 sequencing (WGS) data of VAT (omentum, N = 581) and SAT (N = 469). Detailed information on RNA

20 sequencing experiments, WGS, and quality control of these data have been described elsewhere [8]. The

21 training methods of gene-expression models can be found in previous studies [9-11]. We utilized the pre-

22 trained prediction models from Zenodo (<https://doi.org/10.5281/zenodo.3842289>) for further

1 transcriptome-wide association analyses. We collected the summary data of type 2 diabetes for TWAS  
2 from the DIAGRAM consortium, which was the largest meta-analysis of GWASs, including 74,124 cases  
3 and 824,006 controls of European ancestry [12].  
4

#### 5 **In vitro experimental assays for functional validation**

6 Mouse 3T3-L1 preadipocytes were purchased from the Cell Bank of the Chinese Academy of Sciences.  
7 A complete list of the other materials and reagents used is provided (ESM Table 17). The pLKO.1-puro  
8 (addgene, 10878) was used to knock down gene *Pabpc4* with validation using quantitative RT-PCR  
9 according to previous studies [13]. The culture and differentiation of 3T3-L1 cells have been described  
10 elsewhere [14], and we made small modifications according to the actual conditions. Briefly, the cells  
11 were cultured and maintained in high-glucose DMEM containing 10% FBS and 1%  
12 penicillin/streptomycin in a 5% CO<sub>2</sub> environment. The cells were allowed to grow for 2 days after  
13 confluency. Then, they were induced by incubating the cells with DMEM containing 1.0 µg/mL insulin,  
14 1.0 µM DEX, 0.5 mM IBMX, and 10% FBS for 2 days and DMEM containing 1.0 µg/mL insulin and  
15 10% FBS for another 3 days. The medium was then changed every 2 days until completion of the  
16 differentiation process, and adipocytes were maintained in DMEM medium supplemented with 10% FBS,  
17 after which time the mature 3T3-L1 adipocytes were used for experiments. The mature 3T3-L1  
18 adipocytes were divided into four groups: empty (control), *Pabpc4*-shRNA, empty+insulin, and *Pabpc4*-  
19 shRNA+insulin group, with three replicates for each group. Of these, the insulin treatment was done  
20 for last two groups with an hour and a concentration of 100 nM.  
21 Oil-red-o staining was performed to detect the lipid content and distribution in adipocytes as previously  
22 described [15]. The cultured medium of 3T3-L1 adipocyte cultures was collected, and the glucose content

1 in the supernatant was measured by the GOD-POD glucose kit. The absorbance at 505 nm was measured  
2 by a spectrophotometer, and the absorbance of the standard tube and each tube to be measured was read  
3 by zeroing the blank tube. Glucose consumption was measured in mmol/protein amounts.

4 Quantitative RT-PCR was performed previously described [16]. Notably, *Pparg* expression will be  
5 examined before the induction of the differentiation (on preadipocytes). The primer sequences used  
6 in this study are provided (ESM Table 18). The methods for western blot and ELISA have been described  
7 elsewhere [17].

8

## 9 **Statistical analysis**

### 10 **LD score regression analysis**

11 To evaluate whether type 2 diabetes and glucose-related traits are genetically correlated with VAT, we  
12 applied LD score regression with GWAS summary statistics using LDSC software (all default parameters  
13 see the website <https://github.com/bulik/ldsc/>) [18, 19]. We used precomputed LD scores based on the  
14 European ancestry samples from the 1000 Genomes Project [20] using the GWAS summary statistics of  
15 HapMap3 SNPs. Only autosomal SNPs with MAF > 5% were included in the analysis, and SNPs in the  
16 MHC region were not included due to the long-range LD. Moreover, we calculated the heritability of  
17 type 2 diabetes and glucose-related traits.

18

### 19 **Univariable and multivariable MR analyses**

20 As shown in ESM Fig. 1, we estimated the causal effect of the predicted VAT on type 2 diabetes and  
21 glucose-related traits using a classic MR model [21, 22]. Ideally, a valid IV should satisfy the following  
22 three assumptions (ESM Fig. 1): (1) must be truly associated with VAT (in this study, defined as the  $p <$

1  $5 \times 10^{-8}$ ); (2) not associated with confounders of VAT and type 2 diabetes and glucose-related traits; and  
2 (3) should only be associated with type 2 diabetes and glucose-related traits through VAT.

3 To evaluate the causal effects of VAT on the risk of type 2 diabetes and glucose-related traits by  
4 combining multiple SNPs, we conducted a univariable and bidirectional two-sample MR with seven MR  
5 methods, including IVW [23], weighted median [24], MR-Egger regression [25], MR-PRESSO [26],  
6 MR-RAPS [27], CAUSE [28], and GSMR [29]. IVW is a conventional method that is used to obtain an  
7 MR estimate by performing a meta-analysis of each Wald ratio for multiple SNPs; the largest statistical  
8 power among all MR methods occurs when the selected variants are all valid IVs. The weighted median  
9 estimator determines the median effect of SNPs, providing a valid estimation even when including 50%  
10 of the invalid IVs. MR-Egger regression, with a relaxed criterion, allows the presence of horizontal  
11 pleiotropy across SNPs. Moreover, it also requires the InSIDE (Instrument Strength Independent of  
12 Direct Effect) assumption to be satisfied [25]. Notably, the MR-Egger regression has less power and  
13 provides wider confidence intervals than the IVW. MR-PRESSO is a unified framework evaluating  
14 horizontal pleiotropy in a standard MR model to detect outlier SNPs and provide a corrected MR result.  
15 In addition, we used the MR-RAPS to reduce weak instrument bias. The CAUSE models correlated and  
16 uncorrelated the horizontal pleiotropy, avoiding possible false-positives when using other MR methods.  
17 Compared with other MR methods based on summary statistics, GSMR provides greater statistical power  
18 because GSMR uses genome-wide data to account for the sampling variance between SNPs and  
19 exposure-outcome estimations.

20 To test whether IV assumptions were violated, we evaluated the heterogeneity of the results using  
21 Cochran's Q-test [30] and detected the potential presence of horizontal pleiotropy using the MR-Egger  
22 intercept test, MR-PRESSO global test, and HEIDI test in GSMR. We performed leave-one-out analyses

1 by eliminating SNPs separately and recomputing the effect. We also assessed the possible directional  
2 pleiotropy by observing the symmetry characteristics of funnel plots similar to those used to assess  
3 publication bias in the meta-analysis. Once heterogeneity or horizontal pleiotropy was noted, we  
4 recomputed the MR results after removing the outlier SNPs identified by the MR-PRESSO and HEIDI  
5 tests in GSMR.

6 Obesity-related traits, such as BMI, WC, and WHR, are highly correlated with VAT and have been  
7 reported to be related to type 2 diabetes [31-33]. Thus, we further used MVMR analysis to estimate the  
8 direct causal effects of VAT on the risk of type 2 diabetes independent of the effects of BMI, WC, and  
9 WHR. Additionally, smoking status is associated with increased insulin resistance and central fat  
10 accumulation [34, 35]. Therefore, we added this potential confounder to the multivariable-adjusted  
11 models.

12 We took the IVW results as the primary associations while also considering the consistency of the results  
13 across other MR methods. In this study, we defined the evidence for a potential causal effect of predicted  
14 VAT on the type 2 diabetes risk when the following criteria were met: (1) at least six MR methods results  
15 (including IVW) had a Bonferroni corrected  $p$ -value  $< 8.33 \times 10^{-3}$  ( $0.05/6$ ); (2) at least one of the  
16 multivariable MR results (calculated by two-sample MR or MVMR) showed a similar effect size to the  
17 IVW ( $p$ -value  $< 0.05$ ); (3) other MR methods provided effect sizes similar to those of IVW and MVMR;  
18 and (4) the Egger intercept test provided a  $p$ -value  $> 0.05$  and the funnel plots showed a symmetrical  
19 distribution of SNP effects.

20

## 21 **Transcriptome-wide association analysis**

22 We performed a summary-based TWAS using three different approaches, including the recently

1 developed joint-tissue imputation (JTI) method [9], the PrediXcan [10], and the modified unified test for  
 2 molecular signatures (UTMOST) [9, 11] to establish genetic prediction models of normal VAT gene  
 3 expression using the MetaXcan TWAS pipeline. Overall, the JTI borrows information on each tissue-  
 4 tissue pair (or cell type) and estimates the gene expression profile similarity and the epigenetic similarity  
 5 (chromatin accessibility evaluated by the DNase I hypersensitivity sites in the promoter region) to  
 6 improve the prediction quality. The PrediXcan uses the elastic net with fivefold cross-validation to  
 7 determine the optimal hyperparameter. Similarly, UTMOST borrows information across tissues and  
 8 significantly increases the prediction accuracy by using a sparse group-LASSO method. Zhou et al. [9]  
 9 developed the modified UTMOST framework using uniform hyperparameters across different folds to  
 10 make the hyperparameters directly comparable. It has been confirmed in external datasets that the  
 11 modified UTMOST provides an approximately unbiased estimate of prediction performance. For these  
 12 three prediction models, genes with good prediction quality from fivefold cross-validation ( $r > 0.1$  and  $p$   
 13  $< 0.05$ ) were defined as imputable genes and were used for downstream analyses. Then, we constructed  
 14 a transcriptome model from VAT samples and SNP covariance matrices built from 1000 Genome  
 15 reference samples. Finally, we investigated the associations between the predicted gene expression in  
 16 VAT and type 2 diabetes risk using GWAS summary statistics generated from the DIAGRAM consortium  
 17 (64,124 cases and 824,006 controls). We applied Bonferroni corrections for multiple comparisons, taking  
 18 into account the total number of tested genes across different methods. We considered the associations  
 19 to be significant when  $p_{(TWAS)} < 4.04 \times 10^{-6}$  (0.05/12377) in JTI,  $p_{(TWAS)} < 6.14 \times 10^{-6}$  (0.05/8140) in  
 20 PrediXcan, and  $p_{(TWAS)} < 5.34 \times 10^{-6}$  (0.05/9367) in modified UTMOST.

21

## 22 **Summary-data-based Mendelian randomisation and colocalisation**



1 We further screened the TWAS results using the Summary-data-based Mendelian randomisation (SMR)  
2 followed by the heterogeneity in dependent instrument (HEIDI) test [36] and colocalisation analysis [37].  
3 The SMR was used to test for the potential causal effect of the expression level of a gene (multiple  
4 variants in the cis-eQTL region as the IVs) on a complex trait of interest using summary GWAS data and  
5 expression quantitative trait loci (eQTLs) studies, which can be used to prioritize genes for follow-up  
6 functional studies. Colocalisation analysis was performed to evaluate whether the observed eQTLs in  
7 VAT and type 2 diabetes GWAS associations were consistent with a shared SNP in a given region (1 Mb  
8 on both sides of this gene body). We considered the associations in SMR to be significant when the  
9 Bonferroni corrected  $p_{(SMR)} < 8.55 \times 10^{-6}$  (0.05/5849) and HEIDI  $p > 0.05$ , and a posterior probability of  
10 a hypothesis (PPH4, gene expressions, and type 2 diabetes are associated and share a single causal SNP)  
11 of 70% or higher was considered evidence of colocalisation.  
12 To identify the VAT-specific genes that contribute to type 2 diabetes risk, we performed the same analyses  
13 using SAT data from the GTEx project, including TWAS, SMR, and colocalisation.

14

#### 15 **Bulk RNA-seq analysis and enrichment**

16 To observe the actual expression of TWAS-identified genes, we analyzed publicly available bulk RNA-  
17 seq data of VAT samples from fourteen individuals with type 2 diabetes and six without type 2 diabetes  
18 (GEO database with accession number: GSE71416) [38].

19 For the tissue and cell-type enrichment analysis, we used the Data-driven Expression Prioritized  
20 Integration for Complex Traits (DEPICT) tool [39] to identify tissues and cell types where genes from  
21 associated loci are highly expressed. We further performed functional enrichment analysis for the genes  
22 associated with type 2 diabetes risk. We utilized the GENE2FUNC function in the FUMA tool to annotate

1 the TWAS-identified genes in a biological context [40].

2

### 3 **Single-cell analysis for the SVF and adipocytes differential gene analysis in VAT**

4 We examined the cell type-specific expression of the ten candidate genes by using human VAT single-  
5 cell RNA-seq data profiled from Vijay et al. [41]. First, we divided this scRNA-seq cohort, consisting of  
6 four males and ten females, into two groups: the type 2 diabetes (five individuals) and the nondiabetic  
7 (nine individuals) groups. Then, we performed the transformation on the raw single-cell RNA-seq data  
8 (GEO database with accession number: GSE136230) using Seurat (version 2.3.4) [42]. The key  
9 parameters in the quality control step were consistent with those in the original study [41]. We performed  
10 principal component analysis (PCA) using the top 23 dimensions. Clusters were annotated using  
11 overlapping known marker genes among the cluster-specific genes. Finally, we performed differential  
12 expression analysis to determine whether these candidate genes were differentially expressed in a  
13 particular cell type between the two groups.

14

15 MR analyses were performed in R (version 4.1.0) with the R packages “TwoSampleMR” [3],  
16 “MRPRESSO” [26], “CAUSE” [28], “gsmr” [29], and “MVMR” [43]. TWAS analyses were performed  
17 in Python (version 3.9.1) with a Python script in the MetaXcan pipeline.

18

### 19 **ESM Results**

#### 20 **Participant characteristics and instruments for MR analyses**

21 The characteristics of the participants from UK Biobank, GIANT, and consortia of type 2 diabetes and  
22 glucose-related traits (DIAGRAM, 70KforT2D, and MAGIC) are shown in ESM Table 1. In total, 221

1 SNPs were selected as IVs (ESM Table 3) for predicted VAT mass with an  $F$ -statistic of 901.13, reflecting  
2 a strong instrument strength. In addition, there were 490, 225, 38, and 35 SNPs for BMI, WC, WHR, and  
3 smoking status, respectively, that were used as IVs to perform the multivariable MR analysis.

#### 4 5 **Genetic correlations of predicted VAT with type 2 diabetes and glucose-related traits**

6 According to the LD score regression results, the predicted VAT was genetically correlated with type 2  
7 diabetes ( $r_g = 0.575$ ; 95% CI 0.508, 0.642;  $p = 7.85 \times 10^{-66}$  for DIAGRAM, and  $r_g = 0.331$ ; 95% CI 0.262,  
8 0.400;  $p = 9.21 \times 10^{-21}$  for 70KforT2D) and one of the glucose-related traits (HbA1c:  $r_g = 0.195$ ; 95% CI  
9 0.140, 0.250;  $p = 1.23 \times 10^{-12}$ ). No significant genetic correlations were observed between the predicted  
10 VAT and other glucose-related traits, including FG, 2hGlu, and FI.

#### 11 12 **Two-sample MR results**

##### 13 **Univariable and bidirectional MR**

14 The results of univariable MR analysis for the effect of increased VAT on the risk of type 2 diabetes and  
15 glucose-related traits are shown in ESM Table 4. For discovery analysis, genetically increased VAT was  
16 associated with a higher risk for type 2 diabetes (IVW: OR = 2.48; 95% CI 2.21, 2.79;  $p = 9.28 \times 10^{-54}$ ).  
17 Other MR methods, such as weighted median, MR-Egger, and MR-RAPS, demonstrated good  
18 consistency with the IVW (all  $p < 8.33 \times 10^{-3}$ ). MR-PRESSO detected and removed outlier variants,  
19 providing a corrected estimation (OR = 2.51; 95% CI 2.24, 2.81;  $p = 3.83 \times 10^{-38}$ ). This finding was also  
20 supported by the CAUSE (OR = 1.95; 95% CI 1.77, 2.16;  $p = 6.50 \times 10^{-10}$ ), after accounting for correlated  
21 and uncorrelated horizontal pleiotropy and controlling for possible false-positives. A similar result was  
22 observed across all MR methods for replication analysis, suggesting a causal relationship between

1 genetically determined VAT and type 2 diabetes risk except for the MR-Egger regression (OR = 1.50;  
 2 95% CI 0.93, 2.42;  $p = 9.80 \times 10^{-2}$ ). In addition, the genetically increased VAT mass was associated with  
 3 HbA1c levels (IVW: OR = 1.04; 95% CI 1.02, 1.05;  $p = 1.02 \times 10^{-7}$ ), which was also confirmed by other  
 4 MR methods. There was little evidence to support an association between genetically increased VAT  
 5 mass and other glucose-related factors, such as FG, 2hGlu, and FI.

6

## 7 Sensitivity analyses

8 A series of sensitivity analyses were used to evaluate the heterogeneity and potential horizontal  
 9 pleiotropy (ESM Table 6). Cochran's Q-test showed evidence ( $p < 0.05$ ) for the presence of heterogeneity  
 10 across all MR estimations. The MR-Egger intercept tests indicated the absence of unbalanced horizontal  
 11 pleiotropy ( $p > 0.05$ ) across all MR estimations except for FI [ $p_{\text{(intercept)}} = 0.047$ ]. The leave-one-out tests  
 12 found that no instances when sequentially dropping one a single SNP out led to dramatic changes in the  
 13 overall estimations (ESM Fig. 2-7). The funnel plots showed a symmetrical distribution of variant effects  
 14 for type 2 diabetes and HbA1c, indicating an absence of directional pleiotropy (ESM Fig. 2-4). The  
 15 scatter plots generated by CAUSE are shown in ESM Fig. 8.

16

## 17 References

- 18 1. Karlsson T, Rask-Andersen M, Pan G, et al (2019) Contribution of genetics to visceral adiposity  
 19 and its relation to cardiovascular and metabolic disease. *Nat Med* 25(9):1390-1395.  
 20 <http://doi.org/10.1038/s41591-019-0563-7>
- 21 2. Shungin D, Winkler TW, Croteau-Chonka DC, et al (2015) New genetic loci link adipose and  
 22 insulin biology to body fat distribution. *Nature* 518(7538):187-196. <http://doi.org/10.1038/nature14132>
- 23 3. Hemani G, Zheng J, Elsworth B, et al (2018) The MR-Base platform supports systematic causal  
 24 inference across the human phenome. *eLife* 7. <http://doi.org/10.7554/eLife.34408>
- 25 4. Burgess S, Thompson SG (2011) Avoiding bias from weak instruments in Mendelian randomization  
 26 studies. *Int J Epidemiol* 40(3):755-764. <http://doi.org/10.1093/ije/dyr036>
- 27 5. Scott RA, Scott LJ, Mägi R, et al (2017) An Expanded Genome-Wide Association Study of Type 2

- 1 Diabetes in Europeans. *Diabetes* 66(11):2888-2902. <http://doi.org/10.2337/db16-1253>
- 2 6. Bonàs-Guarch S, Guindo-Martínez M, Miguel-Escalada I, et al (2018) Re-analysis of public genetic  
3 data reveals a rare X-chromosomal variant associated with type 2 diabetes. *Nature Communications*  
4 9(1):321. <http://doi.org/10.1038/s41467-017-02380-9>
- 5 7. Chen J, Spracklen CN, Marenne G, et al (2021) The trans-ancestral genomic architecture of  
6 glycemic traits. *Nat Genet* 53(6):840-860. <http://doi.org/10.1038/s41588-021-00852-9>
- 7 8. Battle A, Brown CD, Engelhardt BE, Montgomery SB (2017) Genetic effects on gene expression  
8 across human tissues. *Nature* 550(7675):204-213. <http://doi.org/10.1038/nature24277>
- 9 9. Zhou D, Jiang Y, Zhong X, Cox NJ, Liu C, Gamazon ER (2020) A unified framework for joint-  
10 tissue transcriptome-wide association and Mendelian randomization analysis. *Nat Genet* 52(11):1239-  
11 1246. <http://doi.org/10.1038/s41588-020-0706-2>
- 12 10. Gamazon ER, Wheeler HE, Shah KP, et al (2015) A gene-based association method for mapping  
13 traits using reference transcriptome data. *Nat Genet* 47(9):1091-1098. <http://doi.org/10.1038/ng.3367>
- 14 11. Hu Y, Li M, Lu Q, et al (2019) A statistical framework for cross-tissue transcriptome-wide  
15 association analysis. *Nat Genet* 51(3):568-576. <http://doi.org/10.1038/s41588-019-0345-7>
- 16 12. Mahajan A, Taliun D, Thurner M, et al (2018) Fine-mapping type 2 diabetes loci to single-variant  
17 resolution using high-density imputation and islet-specific epigenome maps. *Nat Genet* 50(11):1505-  
18 1513. <http://doi.org/10.1038/s41588-018-0241-6>
- 19 13. Pietrobono S, Anichini G, Sala C, et al (2020) ST3GAL1 is a target of the SOX2-GLI1  
20 transcriptional complex and promotes melanoma metastasis through AXL. *Nat Commun* 11(1):5865.  
21 <http://doi.org/10.1038/s41467-020-19575-2>
- 22 14. Zhang Y, Ye M, Chen LJ, Li M, Tang Z, Wang C (2015) Role of the ubiquitin-proteasome system  
23 and autophagy in regulation of insulin sensitivity in serum-starved 3T3-L1 adipocytes. *Endocr J*  
24 62(8):673-686. <http://doi.org/10.1507/endocrj.EJ15-0030>
- 25 15. Mehlem A, Hagberg CE, Muhl L, Eriksson U, Falkevall A (2013) Imaging of neutral lipids by oil  
26 red O for analyzing the metabolic status in health and disease. *Nat Protoc* 8(6):1149-1154.  
27 <http://doi.org/10.1038/nprot.2013.055>
- 28 16. Uzureau P, Uzureau S, Lecordier L, et al (2013) Mechanism of *Trypanosoma brucei* gambiense  
29 resistance to human serum. *Nature* 501(7467):430-434. <http://doi.org/10.1038/nature12516>
- 30 17. Gassen NC, Hartmann J, Zschocke J, et al (2014) Association of FKBP51 with priming of  
31 autophagy pathways and mediation of antidepressant treatment response: evidence in cells, mice, and  
32 humans. *PLoS Med* 11(11):e1001755. <http://doi.org/10.1371/journal.pmed.1001755>
- 33 18. Bulik-Sullivan BK, Loh PR, Finucane HK, et al (2015) LD Score regression distinguishes  
34 confounding from polygenicity in genome-wide association studies. *Nat Genet* 47(3):291-295.  
35 <http://doi.org/10.1038/ng.3211>
- 36 19. Bulik-Sullivan B, Finucane HK, Anttila V, et al (2015) An atlas of genetic correlations across human  
37 diseases and traits. *Nat Genet* 47(11):1236-1241. <http://doi.org/10.1038/ng.3406>
- 38 20. Abecasis GR, Auton A, Brooks LD, et al (2012) An integrated map of genetic variation from 1,092  
39 human genomes. *Nature* 491(7422):56-65. <http://doi.org/10.1038/nature11632>
- 40 21. Zheng J, Baird D, Borges MC, et al (2017) Recent Developments in Mendelian Randomization  
41 Studies. *Curr Epidemiol Rep* 4(4):330-345. <http://doi.org/10.1007/s40471-017-0128-6>
- 42 22. Smith GD, Ebrahim S (2003) 'Mendelian randomization': can genetic epidemiology contribute to  
43 understanding environmental determinants of disease? *Int J Epidemiol* 32(1).
- 44 23. Johnson T, Uk S (2012) Efficient calculation for multi-SNP genetic risk scores.

- 1 24. Bowden J, Davey Smith G, Haycock PC, Burgess S (2016) Consistent Estimation in Mendelian  
2 Randomization with Some Invalid Instruments Using a Weighted Median Estimator. *Genet Epidemiol*  
3 40(4):304-314. <http://doi.org/10.1002/gepi.21965>
- 4 25. Bowden J, Davey Smith G, Burgess S (2015) Mendelian randomization with invalid instruments:  
5 effect estimation and bias detection through Egger regression. *Int J Epidemiol* 44(2):512-525.  
6 <http://doi.org/10.1093/ije/dyv080>
- 7 26. Verbanck M, Chen C-Y, Neale B, Do R (2018) Detection of widespread horizontal pleiotropy in  
8 causal relationships inferred from Mendelian randomization between complex traits and diseases. *Nat*  
9 *Genet* 50(5):693-698. <http://doi.org/10.1038/s41588-018-0099-7>
- 10 27. Zhao Q, Wang J, Bowden J, Small D (2018) Statistical inference in two-sample summary-data  
11 Mendelian randomization using robust adjusted profile score. *Annals of Statistics* 48.  
12 <http://doi.org/10.1214/19-AOS1866>
- 13 28. Morrison J, Knoblach N, Marcus JH, Stephens M, He X (2020) Mendelian randomization  
14 accounting for correlated and uncorrelated pleiotropic effects using genome-wide summary statistics.  
15 *Nat Genet* 52(7):740-747. <http://doi.org/10.1038/s41588-020-0631-4>
- 16 29. Zhu Z, Zheng Z, Zhang F, et al (2018) Causal associations between risk factors and common  
17 diseases inferred from GWAS summary data. *Nature Communications* 9(1):224.  
18 <http://doi.org/10.1038/s41467-017-02317-2>
- 19 30. Burgess S, Bowden J, Fall T, Ingelsson E, Thompson SG (2017) Sensitivity Analyses for Robust  
20 Causal Inference from Mendelian Randomization Analyses with Multiple Genetic Variants.  
21 *Epidemiology (Cambridge, Mass)* 28(1):30-42.
- 22 31. Teufel F, Seiglie JA, Geldsetzer P, et al (2021) Body-mass index and diabetes risk in 57 low-income  
23 and middle-income countries: a cross-sectional study of nationally representative, individual-level data  
24 in 685 616 adults. *Lancet* 398(10296):238-248. [http://doi.org/10.1016/s0140-6736\(21\)00844-8](http://doi.org/10.1016/s0140-6736(21)00844-8)
- 25 32. Feller S, Boeing H, Pischon T (2010) Body mass index, waist circumference, and the risk of type 2  
26 diabetes mellitus: implications for routine clinical practice. *Dtsch Arztebl Int* 107(26):470-476.  
27 <http://doi.org/10.3238/arztebl.2010.0470>
- 28 33. Vazquez G, Duval S, Jacobs DR, Jr., Silventoinen K (2007) Comparison of body mass index, waist  
29 circumference, and waist/hip ratio in predicting incident diabetes: a meta-analysis. *Epidemiol Rev*  
30 29:115-128. <http://doi.org/10.1093/epirev/mxm008>
- 31 34. Eliasson B (2003) Cigarette smoking and diabetes. *Prog Cardiovasc Dis* 45(5):405-413.  
32 <http://doi.org/10.1053/pcad.2003.00103>
- 33 35. Chiolero A, Faeh D, Paccaud F, Cornuz J (2008) Consequences of smoking for body weight, body  
34 fat distribution, and insulin resistance. *Am J Clin Nutr* 87(4):801-809.  
35 <http://doi.org/10.1093/ajcn/87.4.801>
- 36 36. Zhu Z, Zhang F, Hu H, et al (2016) Integration of summary data from GWAS and eQTL studies  
37 predicts complex trait gene targets. *Nat Genet* 48(5):481-487. <http://doi.org/10.1038/ng.3538>
- 38 37. Giambartolomei C, Vukcevic D, Schadt EE, et al (2014) Bayesian test for colocalisation between  
39 pairs of genetic association studies using summary statistics. *PLoS Genet* 10(5):e1004383.  
40 <http://doi.org/10.1371/journal.pgen.1004383>
- 41 38. Doumatey AP, Xu H, Huang H, et al (2015) Global Gene Expression Profiling in Omental Adipose  
42 Tissue of Morbidly Obese Diabetic African Americans. *J Endocrinol Metab* 5(3):199-210.  
43 <http://doi.org/10.14740/jem286w>
- 44 39. Pers TH, Karjalainen JM, Chan Y, et al (2015) Biological interpretation of genome-wide association

1 studies using predicted gene functions. Nat Commun 6:5890. <http://doi.org/10.1038/ncomms6890>

2 40. Watanabe K, Taskesen E, van Bochoven A, Posthuma D (2017) Functional mapping and annotation

3 of genetic associations with FUMA. Nature Communications 8(1):1826. [http://doi.org/10.1038/s41467-](http://doi.org/10.1038/s41467-017-01261-5)

4 [017-01261-5](http://doi.org/10.1038/s41467-017-01261-5)

5 41. Vijay J, Gauthier MF, Biswell RL, et al (2020) Single-cell analysis of human adipose tissue

6 identifies depot and disease specific cell types. Nat Metab 2(1):97-109. [http://doi.org/10.1038/s42255-](http://doi.org/10.1038/s42255-019-0152-6)

7 [019-0152-6](http://doi.org/10.1038/s42255-019-0152-6)

8 42. Butler A, Hoffman P, Smibert P, Papalexi E, Satija R (2018) Integrating single-cell transcriptomic

9 data across different conditions, technologies, and species. Nat Biotechnol 36(5):411-420.

10 <http://doi.org/10.1038/nbt.4096>

11 43. Sanderson E, Davey Smith G, Windmeijer F, Bowden J (2018) An examination of multivariable

12 Mendelian randomization in the single-sample and two-sample summary data settings. Int J Epidemiol

13 48(3):713-727. <http://doi.org/10.1093/ije/dyy262>

14

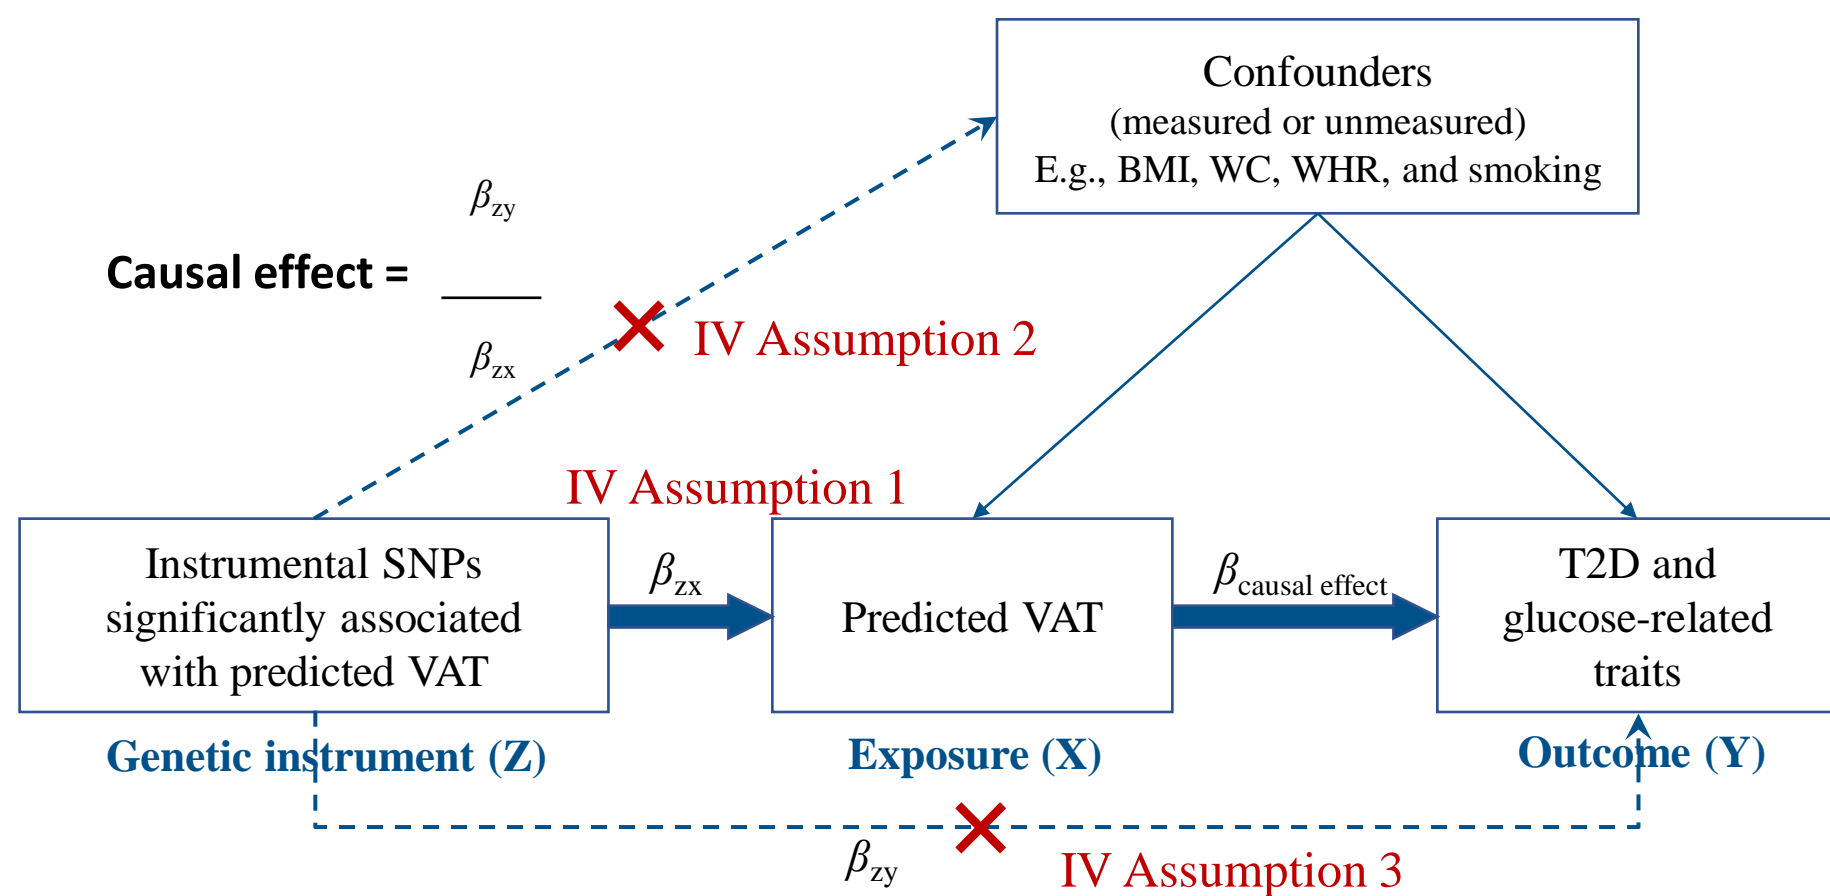

ESM Fig 1. Instrumental variable (IV) assumptions of Mendelian randomisation.

BMI indicates body mass index; WC, waist circumference; WHR, waist-to-hip ratio; SNP, single nucleotide polymorphism; VAT, visceral adipose tissue; T2D, type 2 diabetes.



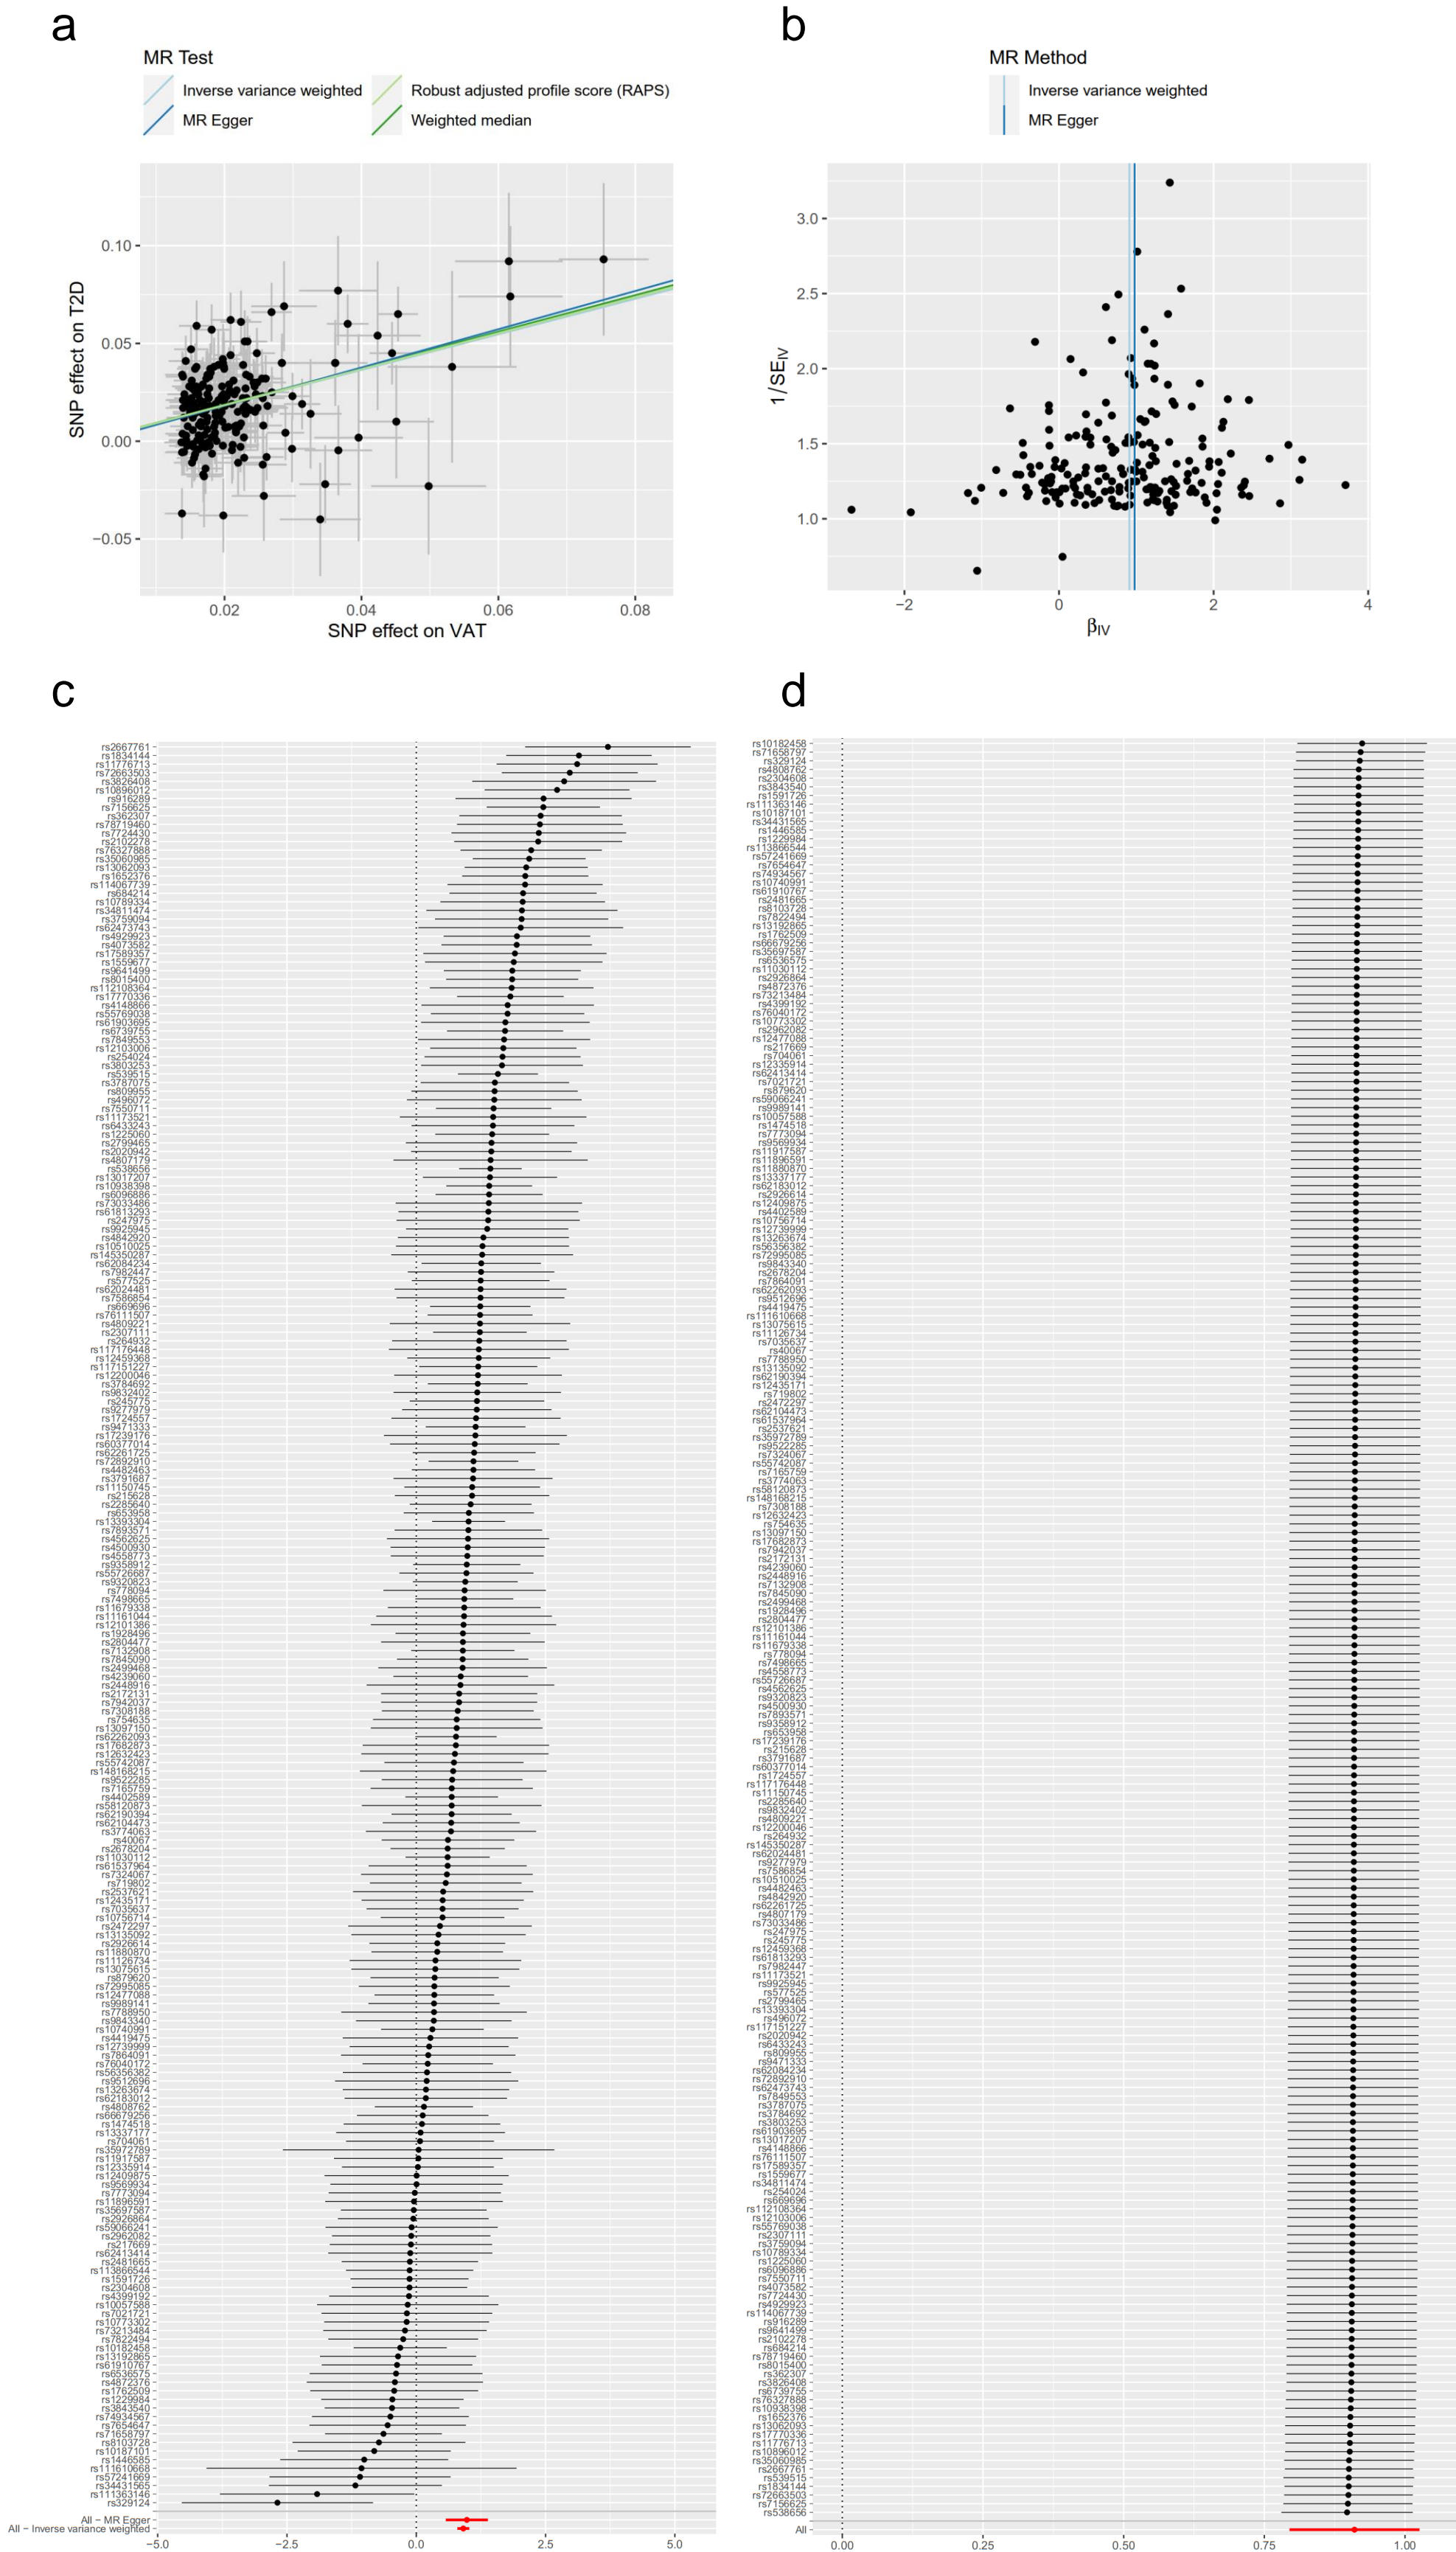

ESM Fig. 2. Scatter plot (a), funnel plot (b), forest plot (c), and leave-one-out test (d) for VAT on T2D (discovery analysis).

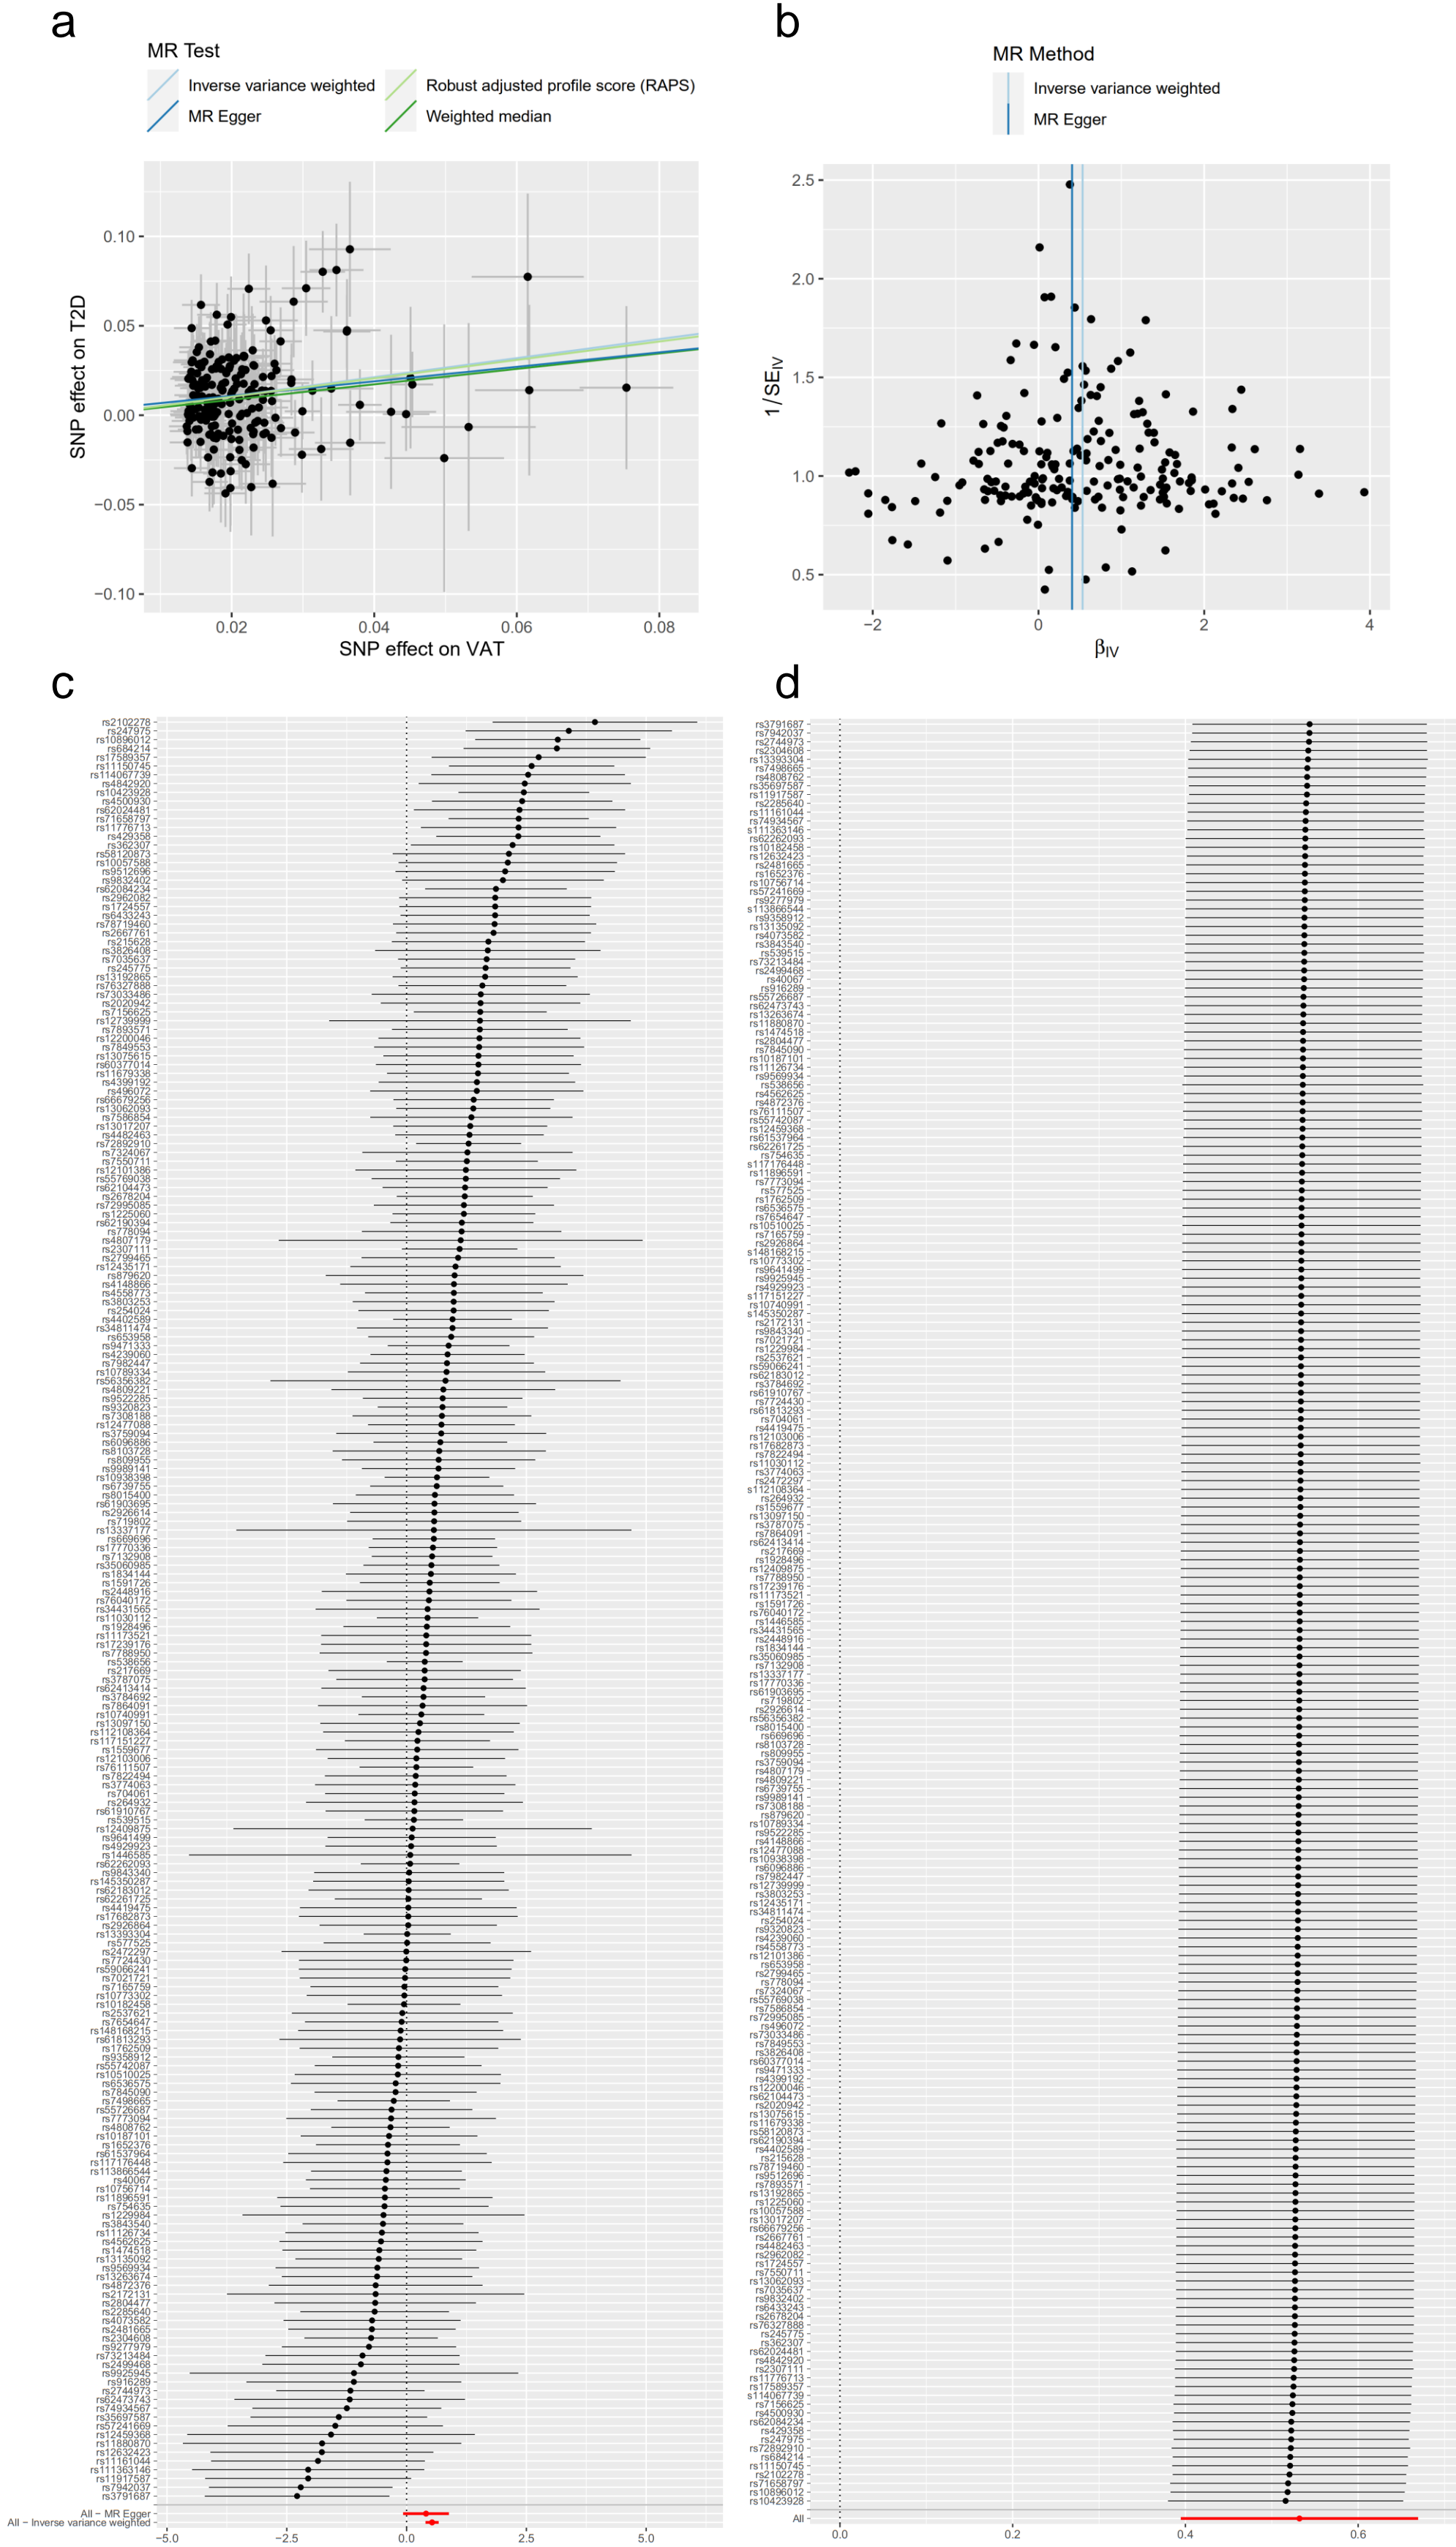

ESM Fig. 3. Scatter plot (a), funnel plot (b), forest plot (c), and leave-one-out test (d) for VAT on T2D (replication analysis).



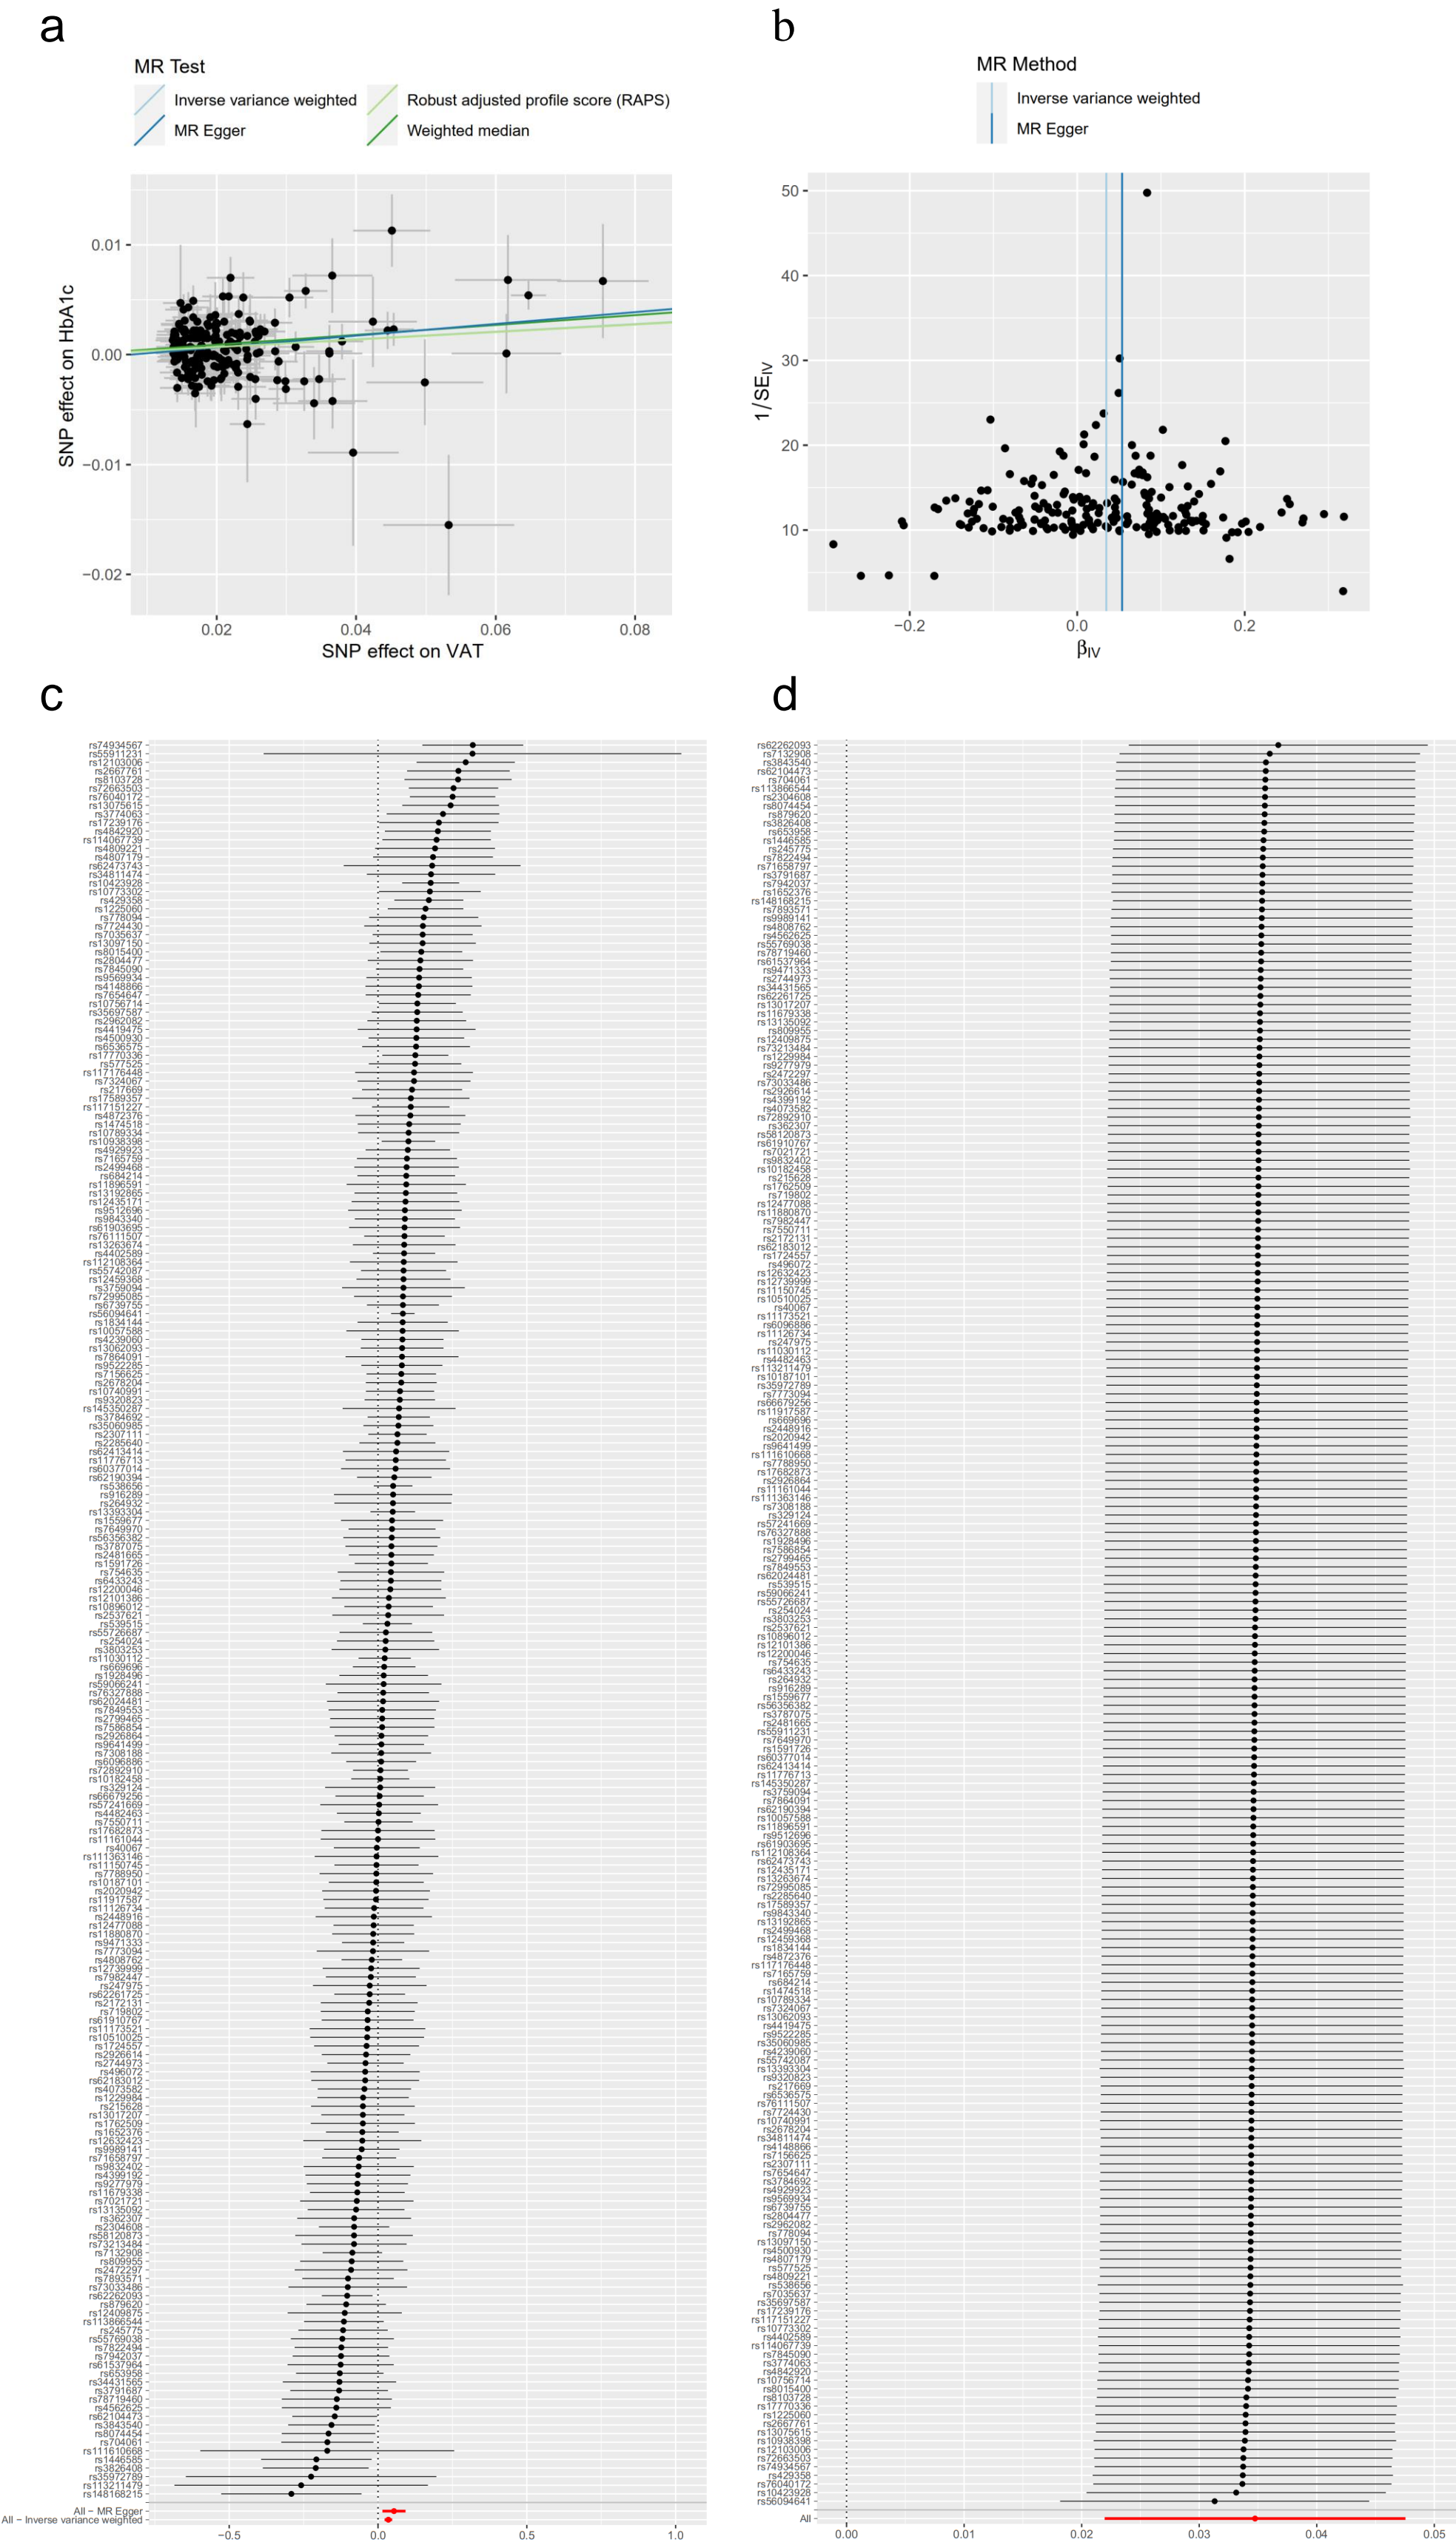

ESM Fig. 4. Scatter plot (a), funnel plot (b), forest plot (c), and leave-one-out test (d) for VAT on HbA1c.

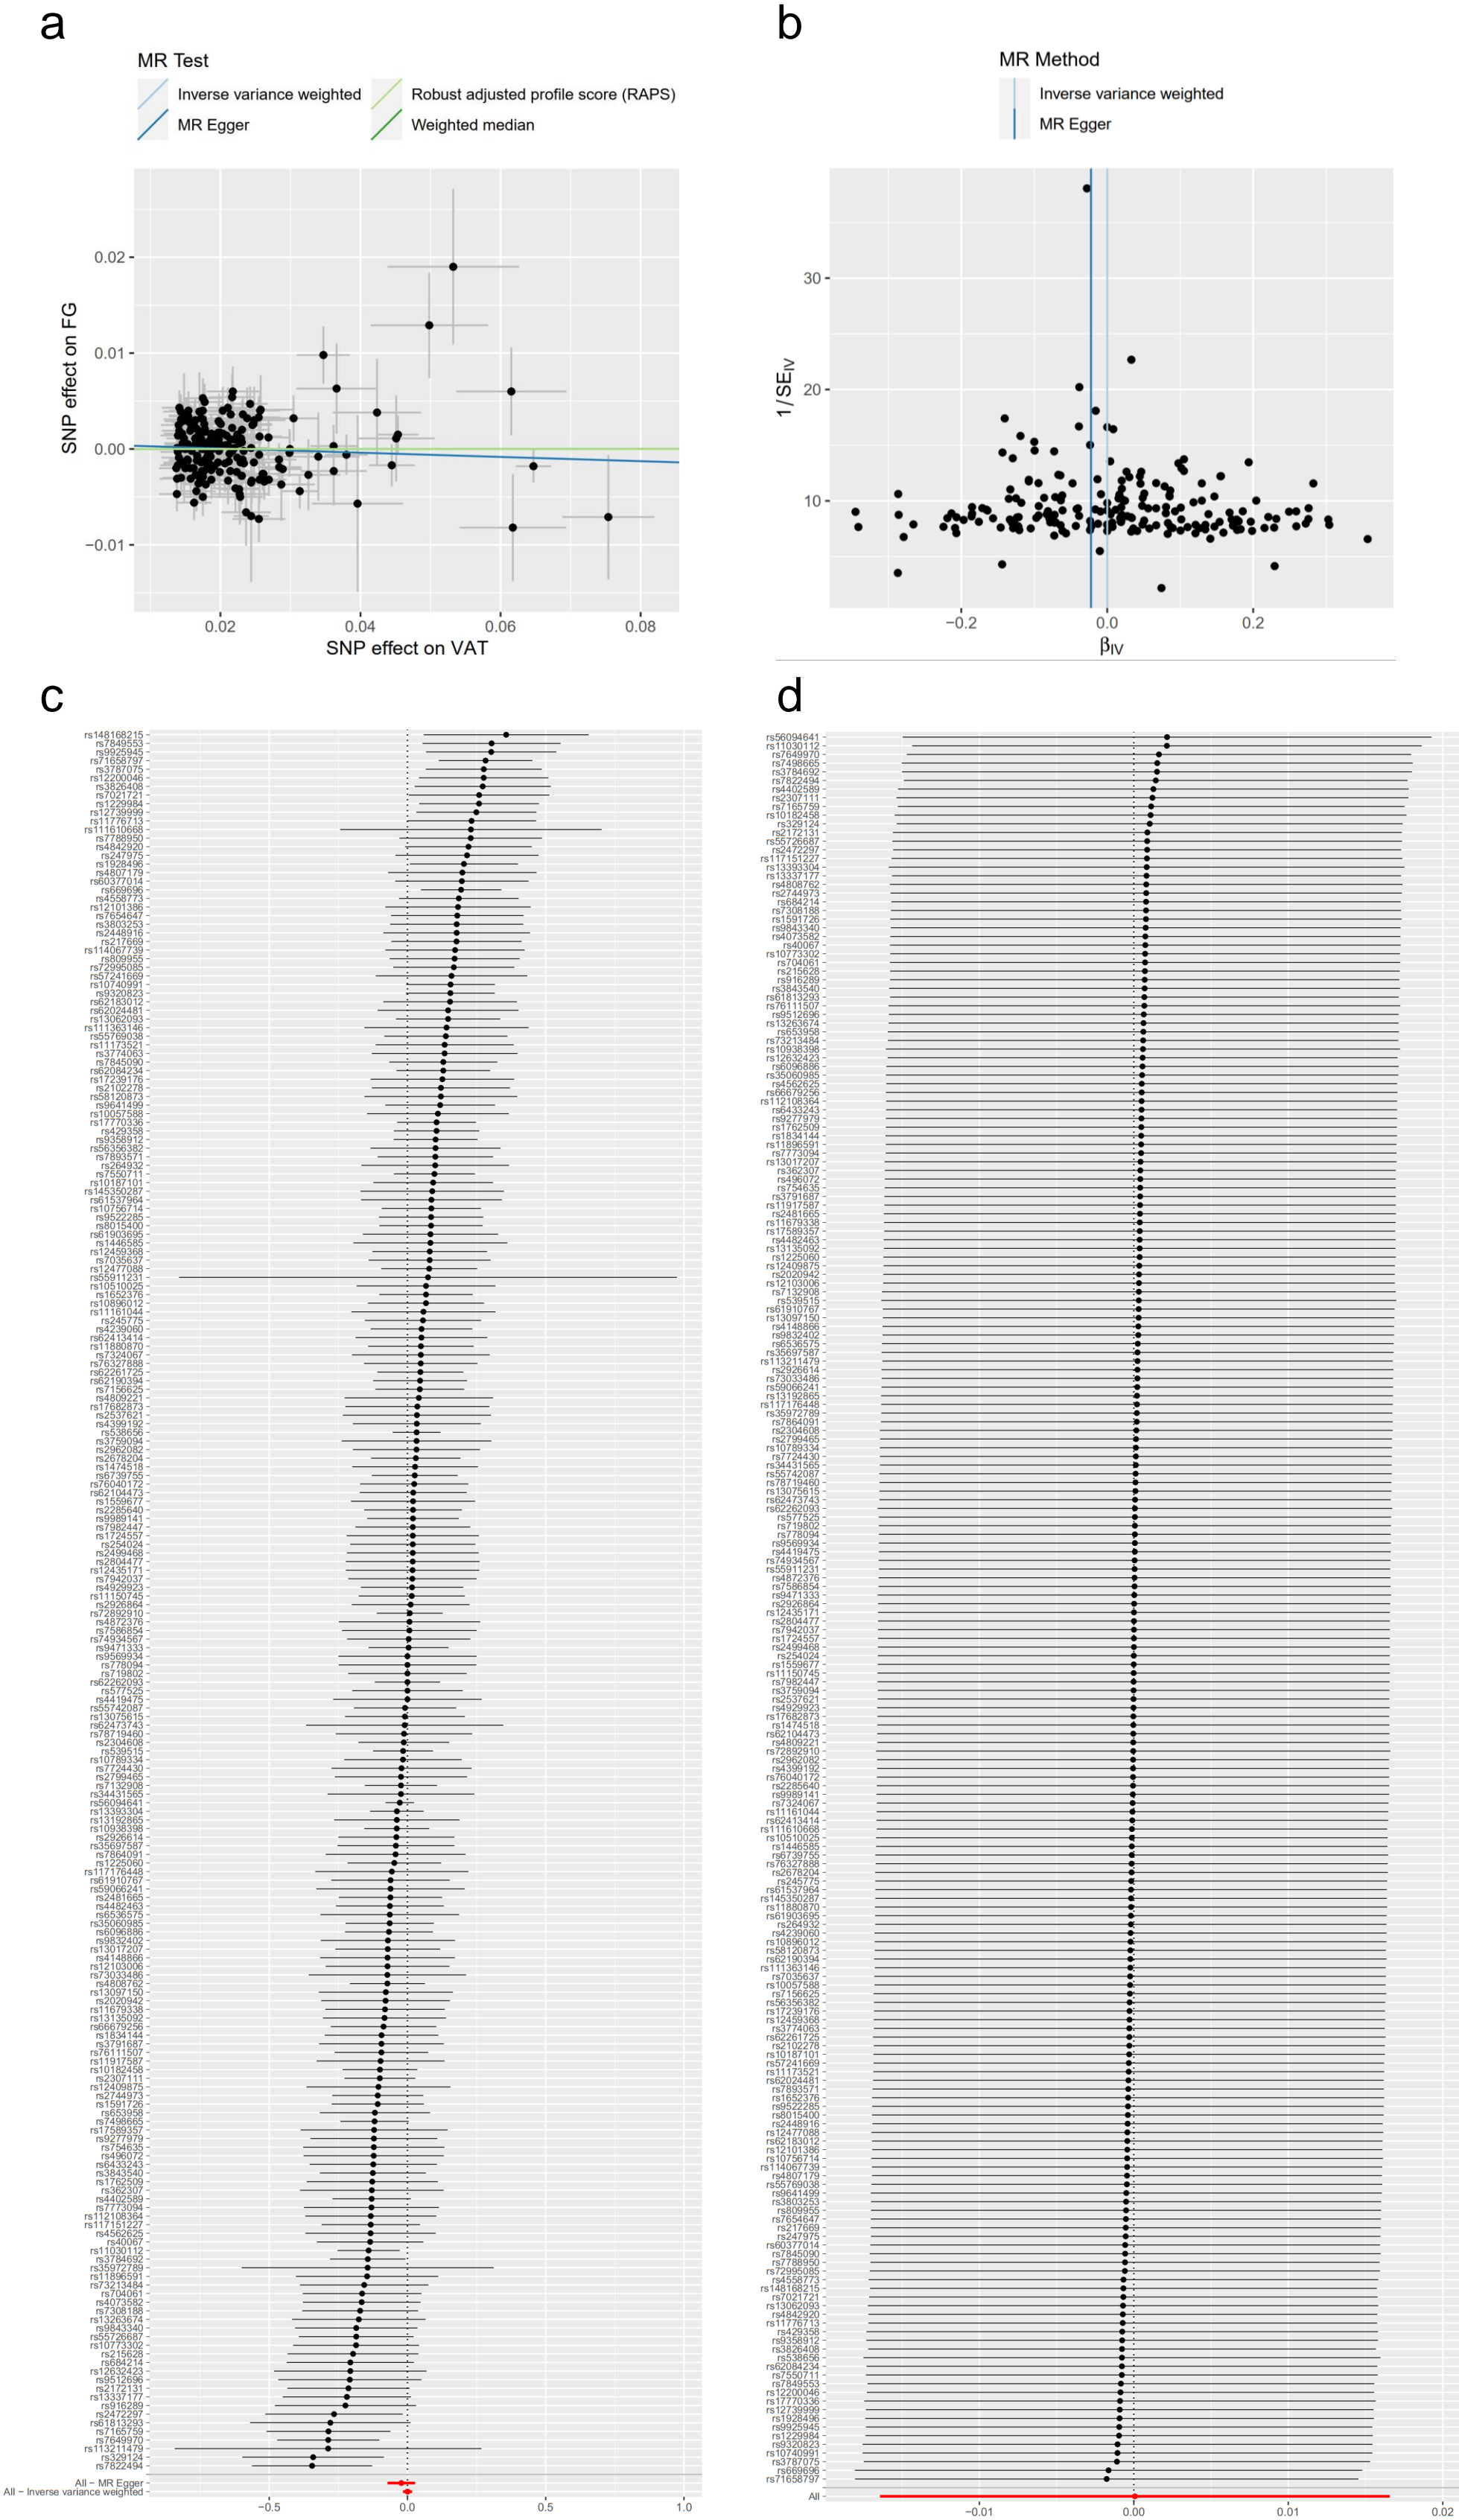

ESM Fig. 5. Scatter plot (a), funnel plot (b), forest plot (c), and leave-one-out test (d) for VAT on fasting glucose.









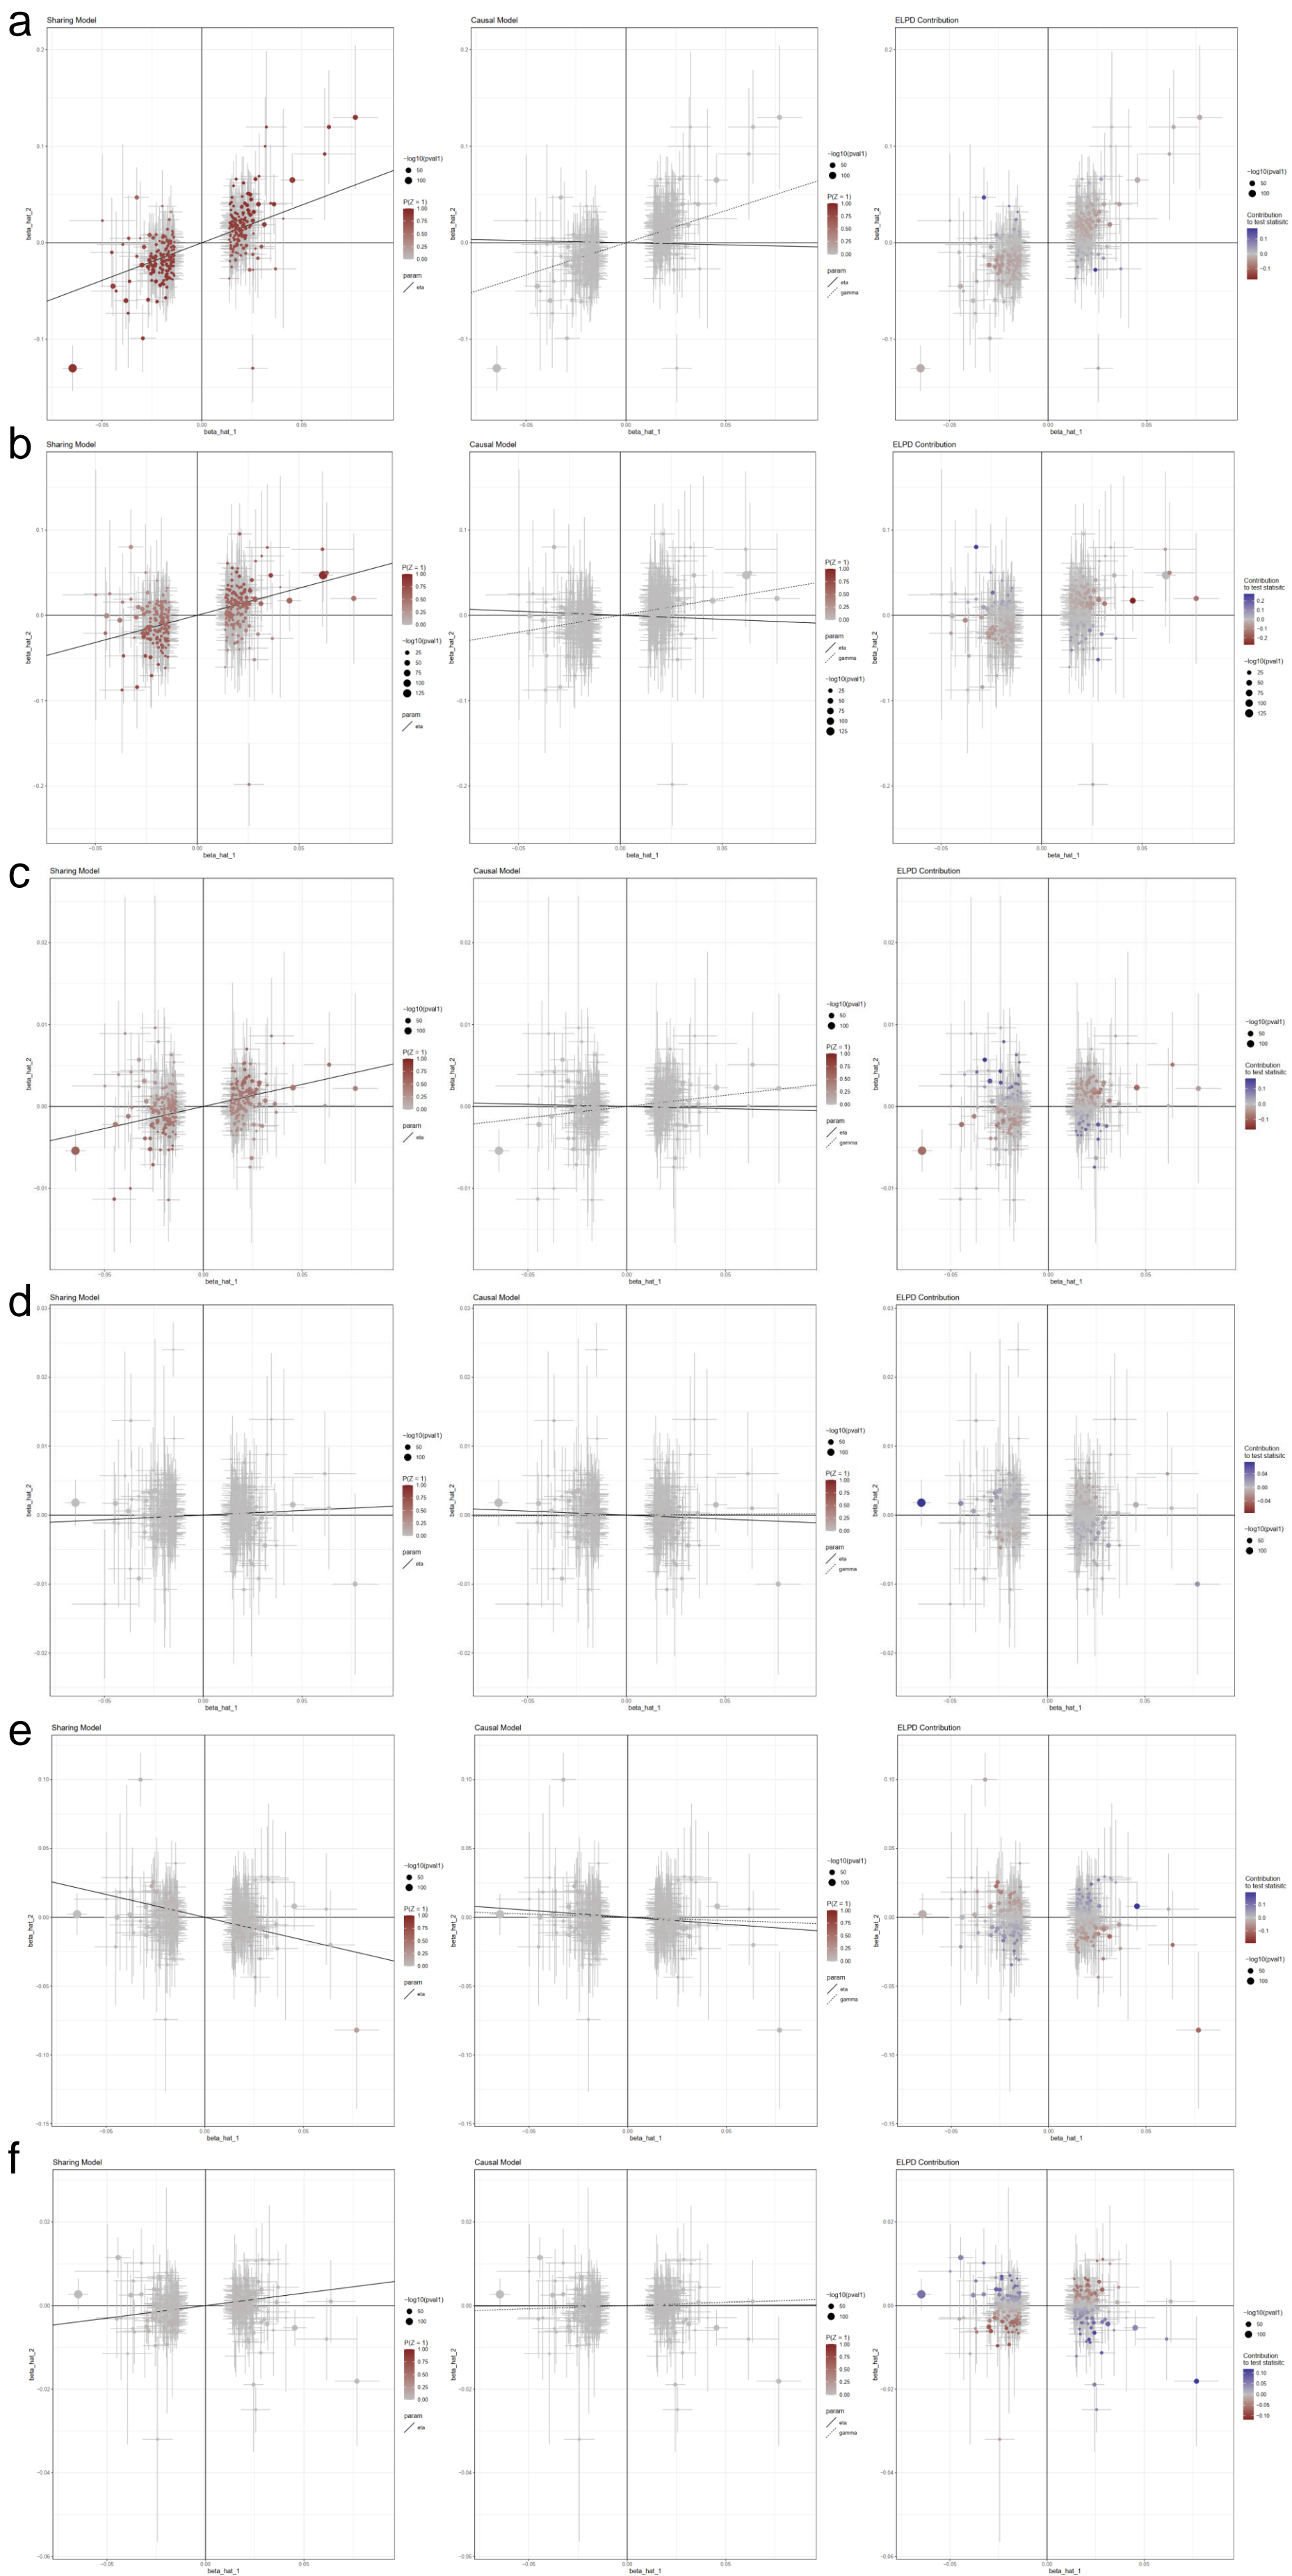

ESM Fig. 8 Scatter plot for discovery T2D (a), replication T2D (b), HbA1c (c), FG (d), 2hGlu (e), and FI (f) using CAUSE.

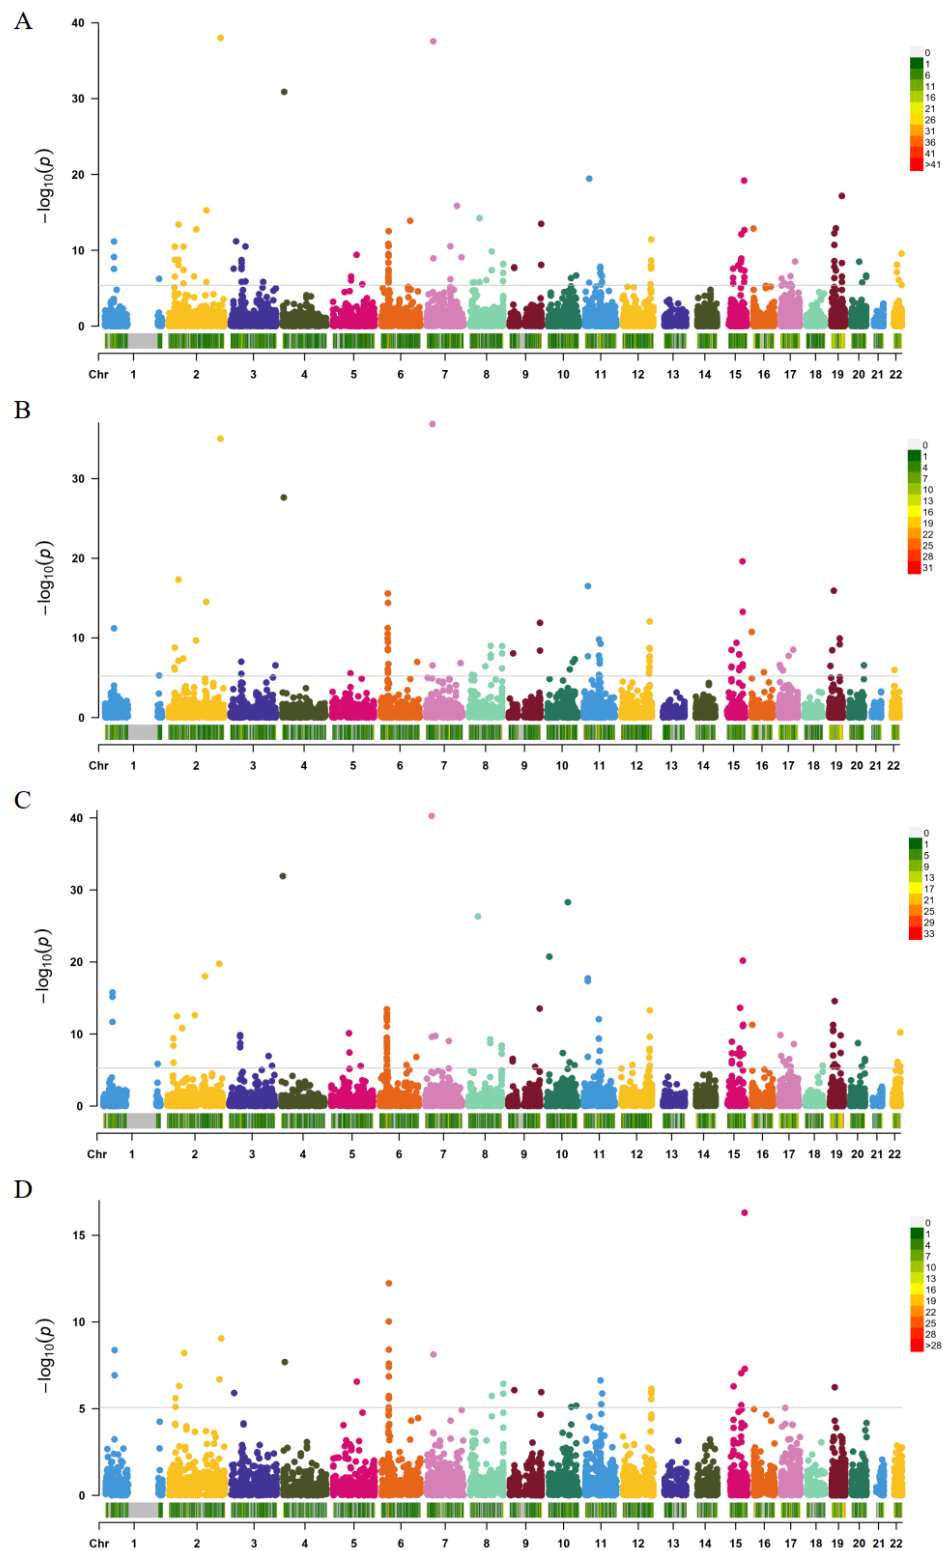

ESM Fig.9. Manhattan plots of JTI (a), PrediXcan (b), and UTMOST (c) and SMR (d). The results showing  $P$ -values on the  $-\log_{10}$  scale on the y-axis for VAT gene expression-T2D associations. The grey horizontal line represents the relative Bonferroni corrected  $P$ -value.



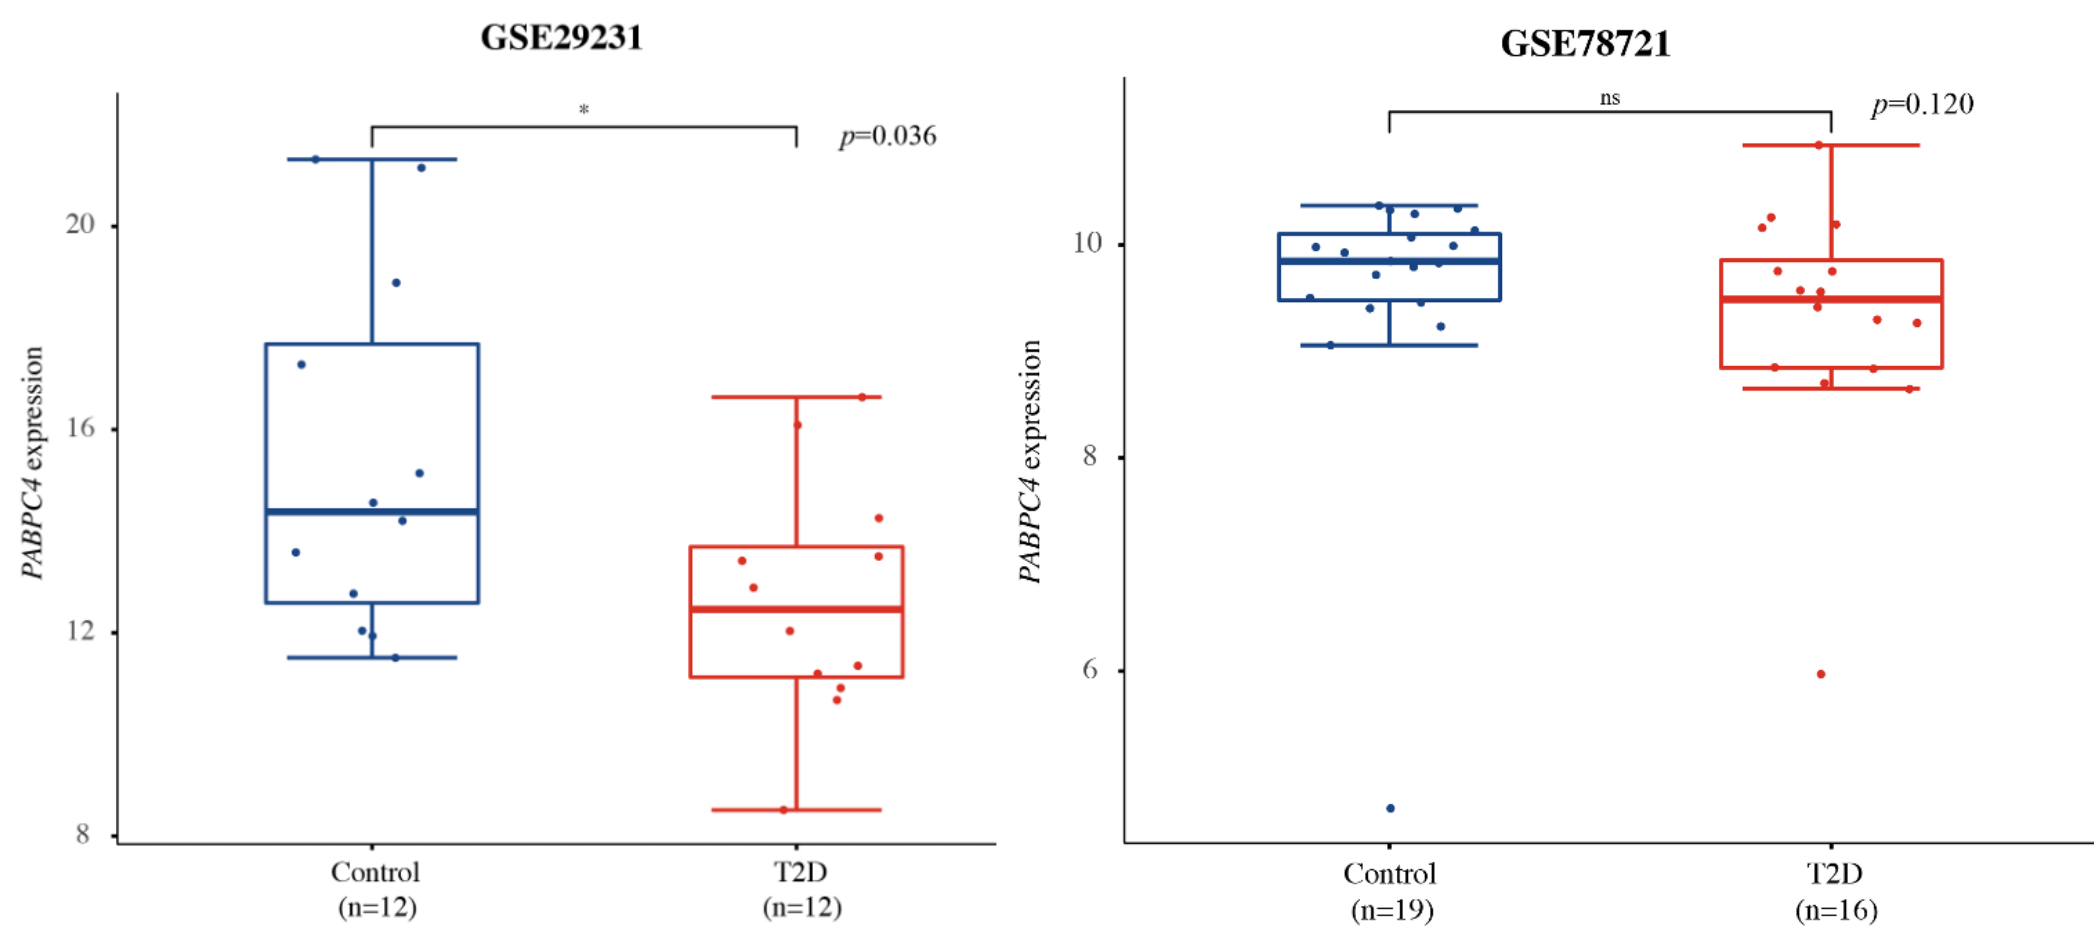

ESM Fig. 10. *PABPC4* expression in different publicly available data for visceral adipose.

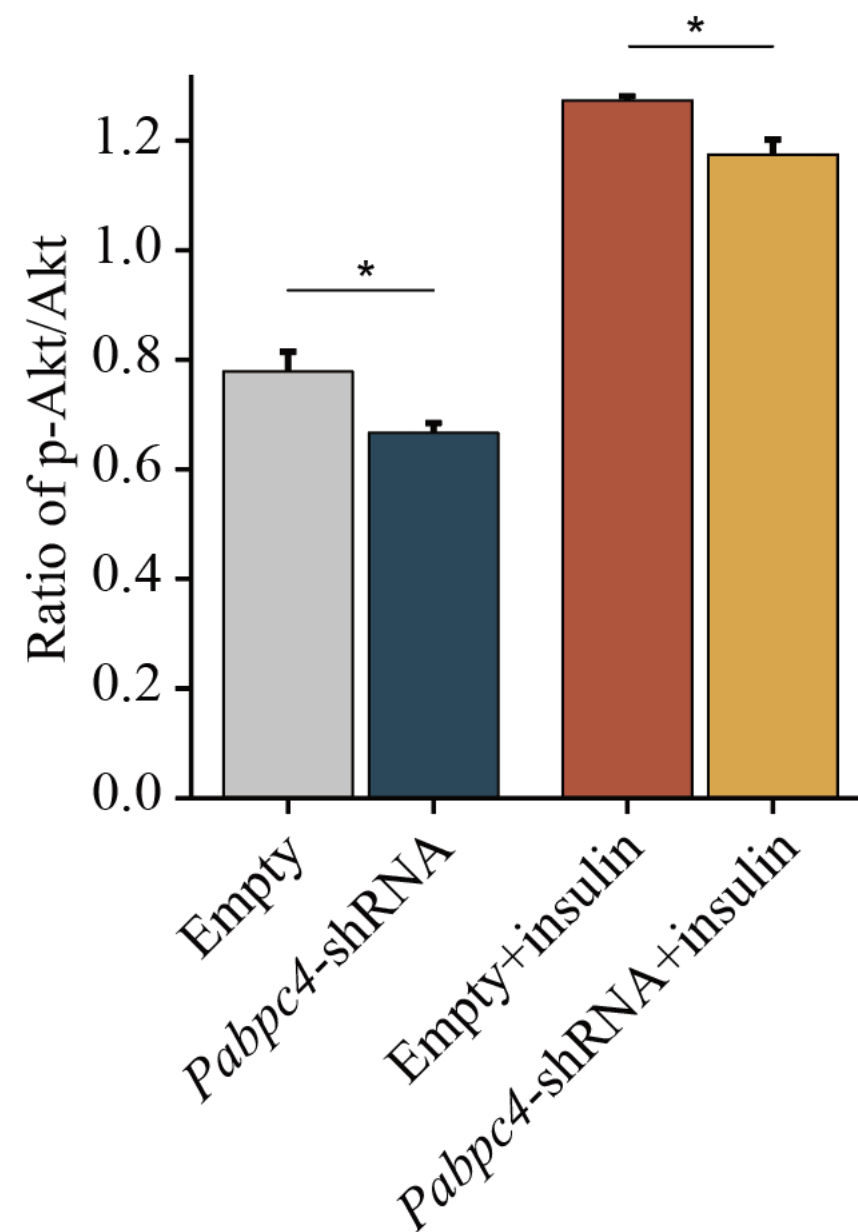

ESM Fig 11. P-akt/akt assessment.
